# Supplementary material for: A Pd-catalyzed one-pot cascade consisting of C–C/C–O/N–N bond formation to access benzoxazine fused 1,2,3-triazoles
Source: Royal Society of Chemistry journal article supplement (doi:10.1039/d1ob01539g), 2021-01-01
Supplement: d1ob01539g1.pdf [file d1ob01539g1.pdf]

## **Pd-catalyzed one-pot cascade consisting C-C/C-O/N-N bond formation to access benzoxazine fused 1,2,3-triazoles**

Pooja Soam, Hashmita Gaba, Debasish Mandal and Vikas Tyagi\*

School of Chemistry and Biochemistry, Thapar Institute of Engineering and Technology, Patiala-147004,  
Punjab, India

## **Index**

### **Table of Contents**

|                                                                                     |         |
|-------------------------------------------------------------------------------------|---------|
| Control Experiments.....                                                            | S2      |
| PES and Transition state.....                                                       | S3-S7   |
| Characterization data of compounds (1a-1h).....                                     | S8      |
| Copies of H <sup>1</sup> NMR data of compounds (1a-1h).....                         | S9-S13  |
| Copies of H <sup>1</sup> NMR and C <sup>13</sup> NMR data of compounds (3a-3m)..... | S14-S27 |
| Comparison of theoretical and experimental NMR data.....                            | S28-S29 |
| Optimized Cartesian Coordinates and electronic energies.....                        | S30-S51 |
| X-ray crystal data.....                                                             | S52-S53 |

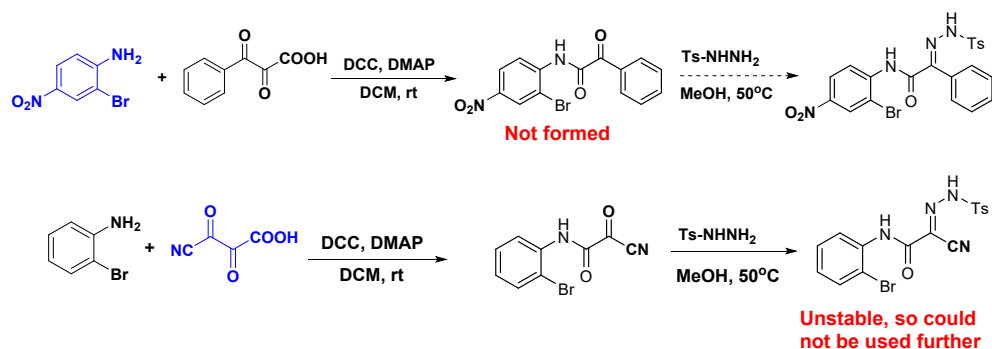

**Scheme S1:** Reaction of 4-nitroaniline and cyanoacetic acid

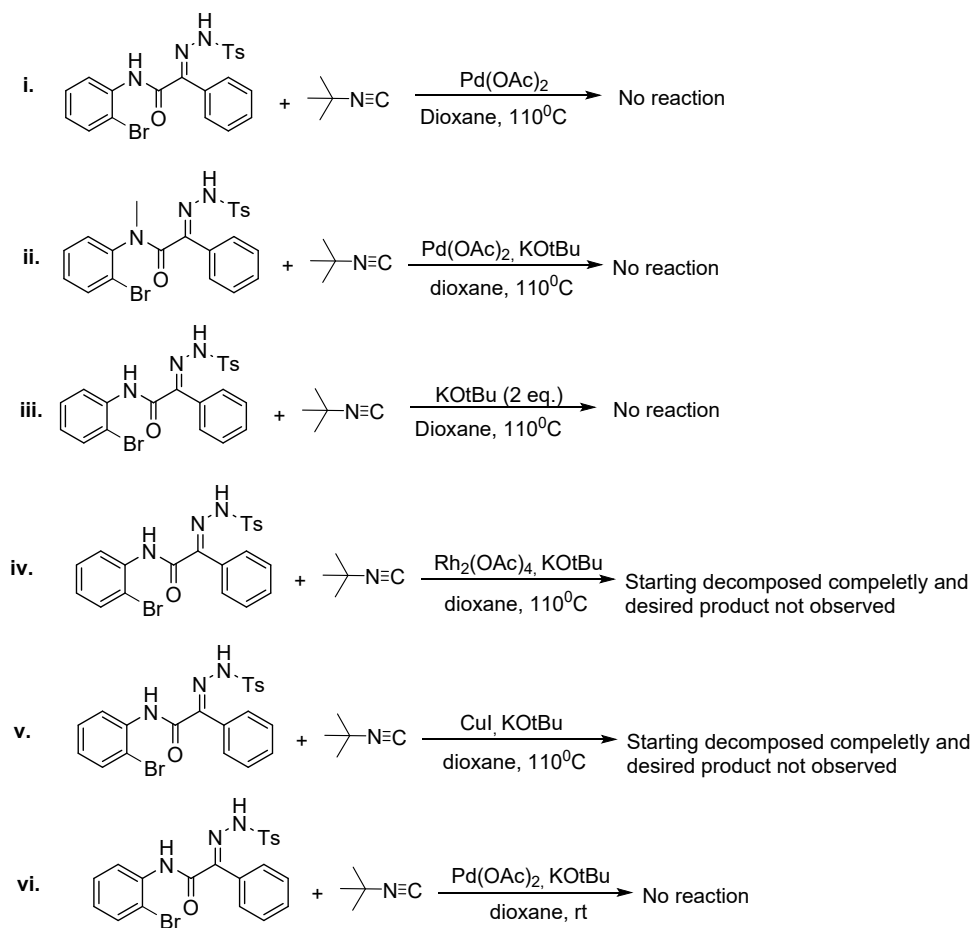

**Figure S1:** Control experiments

## PES and Transition state

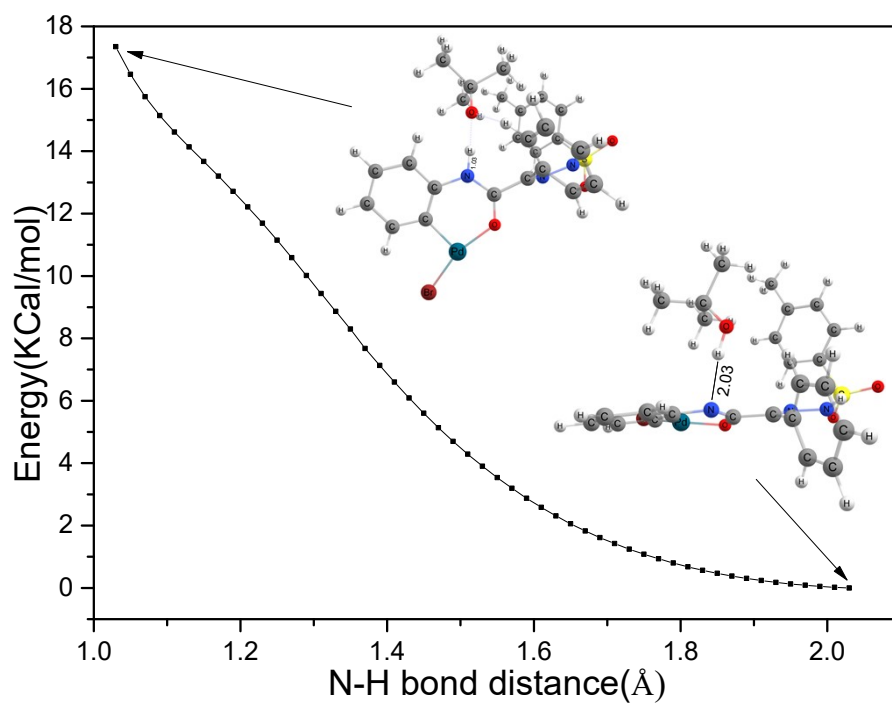

**Figure S2:** Relaxed potential energy surface scan for N-H proton abstraction from N-aryl amide in presence of strong base (KOtBu)

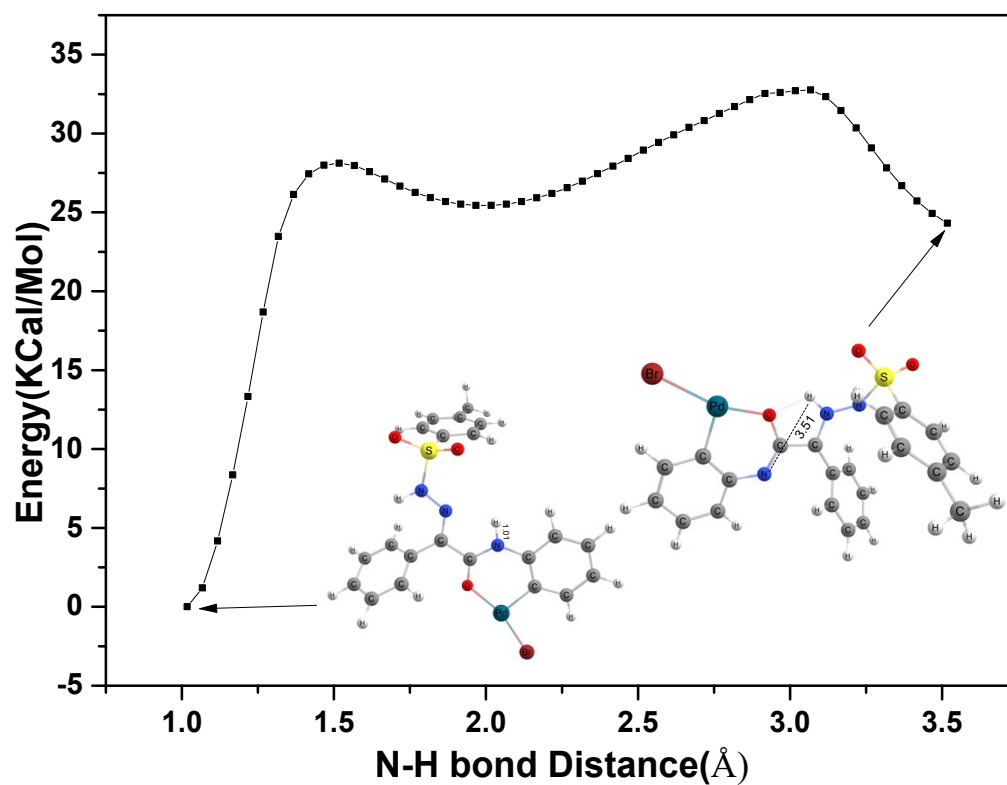

**Figure S3:** Relaxed potential energy surface scan for N-H proton abstraction from N-aryl amide in absence of strong base

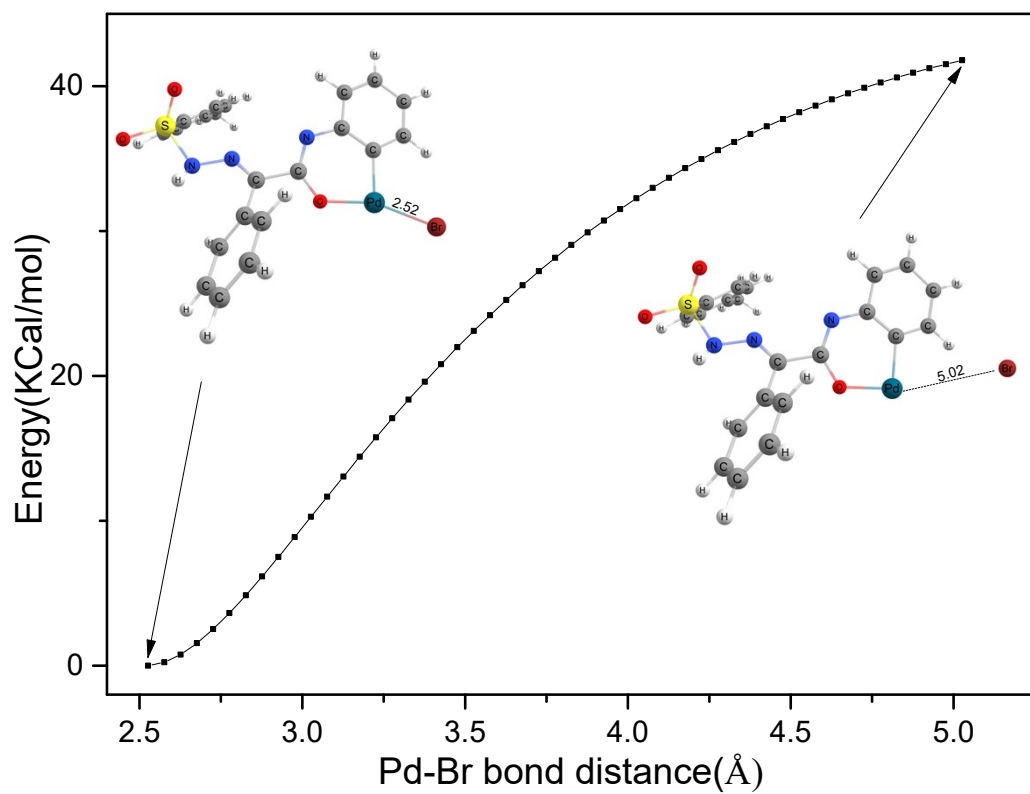

**Figure S4:** Relaxed potential energy surface scan for Pd-Br bond breaking

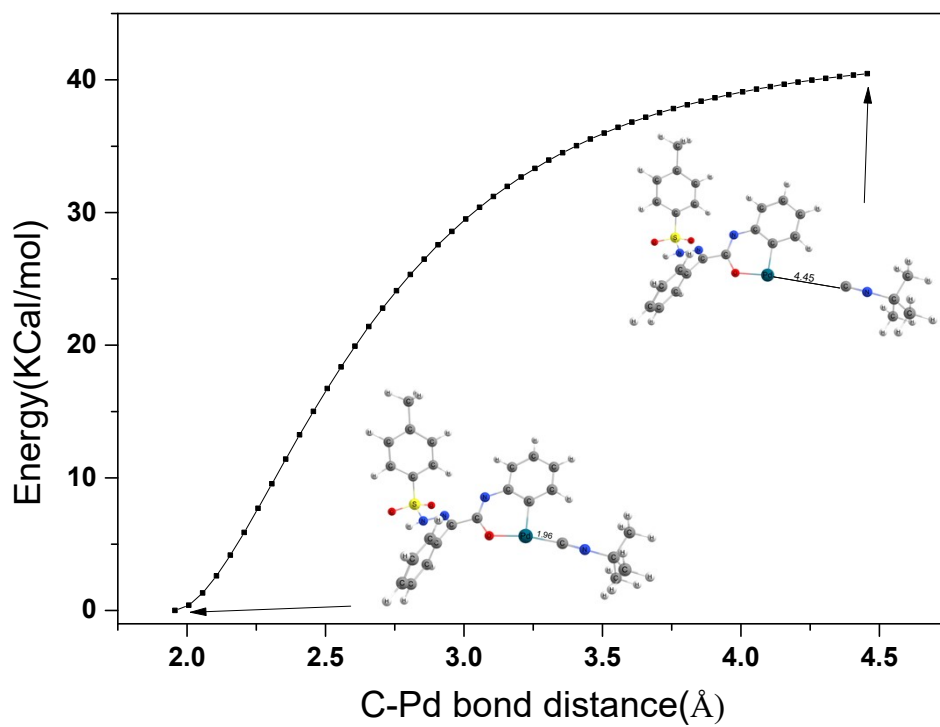

**Figure S5:** Relaxed potential energy surface for C-Pd bond formation

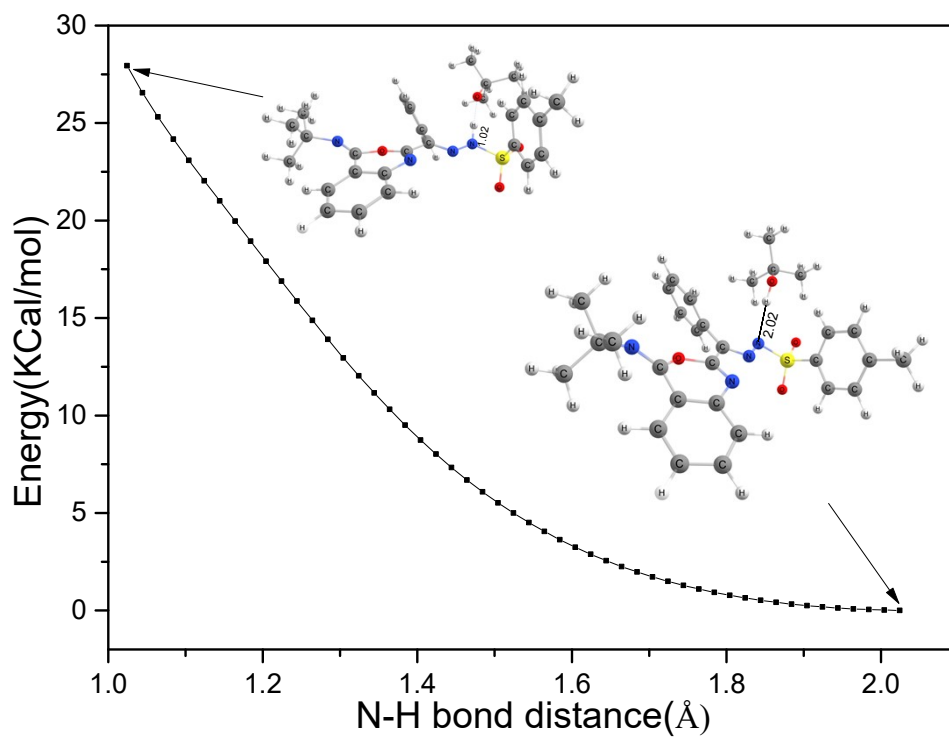

**Figure S6:** PES Scan for N-H proton abstraction from tosyl hydrazone in presence of base

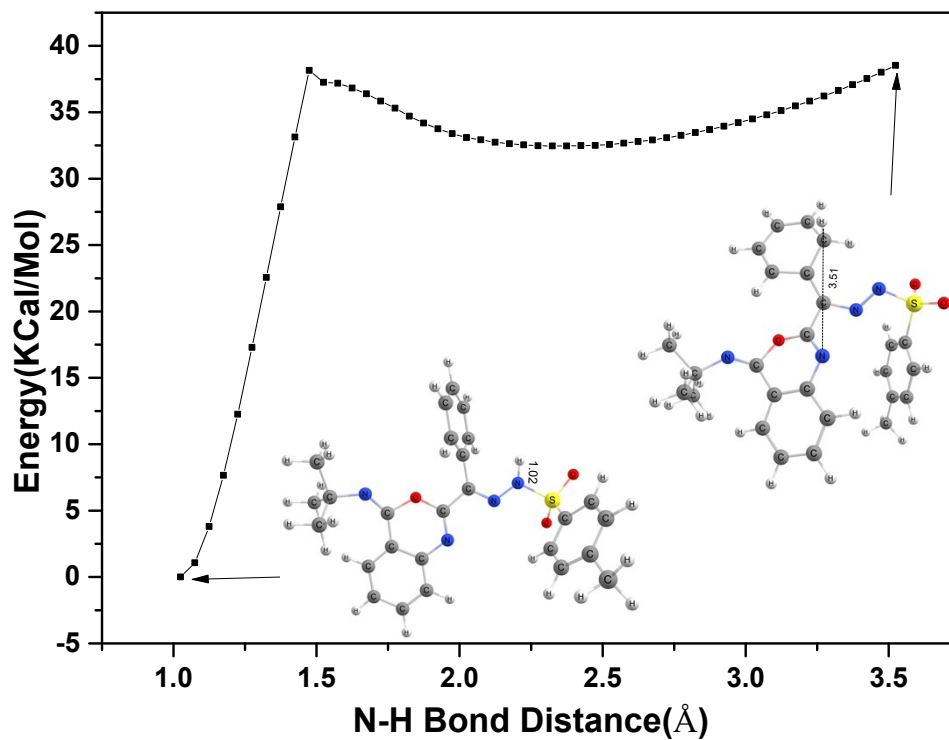

**Figure S7:** PES Scan for N-H proton abstraction from tosyl hydrazone in absence of base

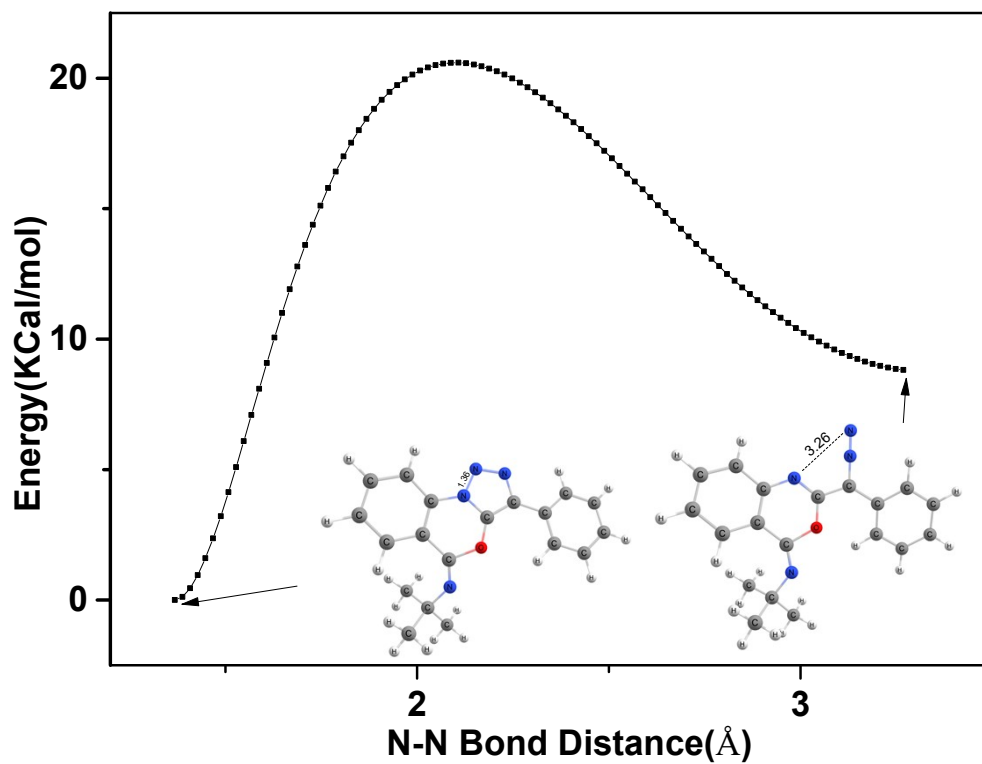

Figure S8: PES scan calculation for TS<sub>11-12</sub>

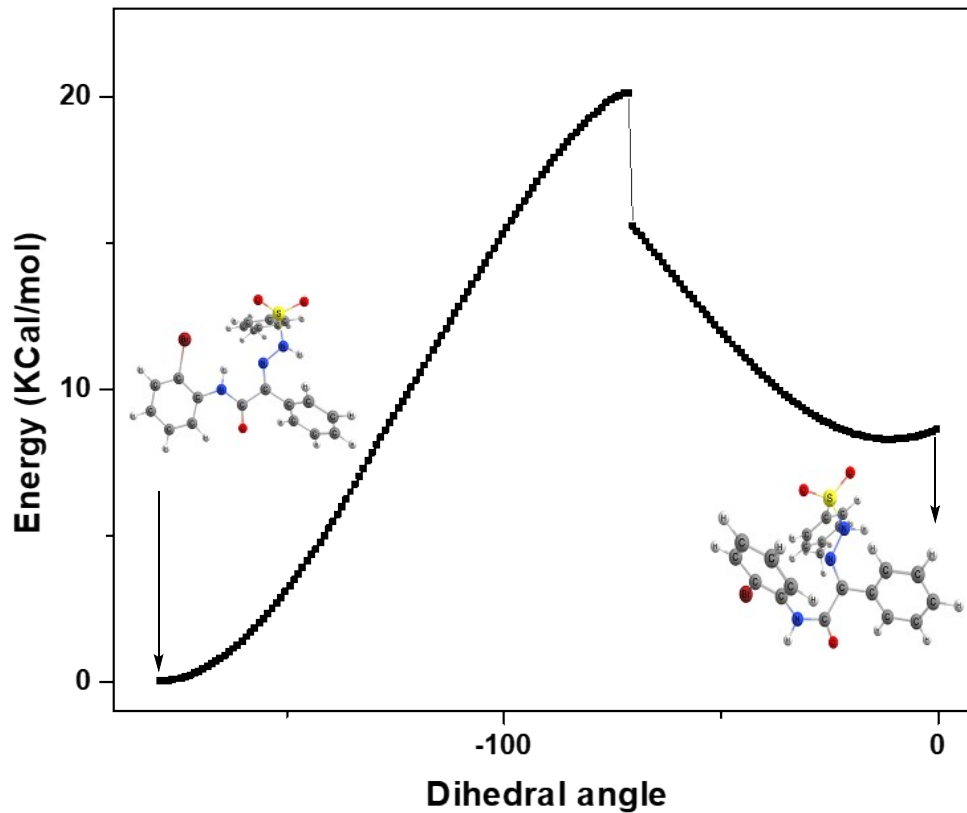

Figure S9: PES Scan for rotation along O-C-N-H dihedral

## Characterization Data of compounds (1a-1h)

### 1a. Mixture of (*E*) & (*Z*)- *N*-(2-bromophenyl)-2-phenyl-2-(2-tosylhydrazono)acetamide

Solid (Trans: Cis=3:1), <sup>1</sup>H NMR (500 MHz, CDCl<sub>3</sub>): δ 8.56 (d, *J* = 10.0 Hz, 1H), δ 8.41-8.39 (m, 2H), δ 8.18-8.16 (m, 1H), δ 7.86 (t, *J* = 10.0 Hz, 2H), δ 7.72-7.46 (m, 7H), δ 7.37-7.32 (m, 2H), δ 7.28 (d, *J* = 6.5 Hz, 2H), δ 2.43 (s, 1H), δ 2.36 (s, 3H) ppm.

### 1b. (*E*)-*N*-(2-bromo-4-chlorophenyl)-2-phenyl-2-(2-tosylhydrazono)acetamide

Solid, <sup>1</sup>H NMR (500 MHz, CDCl<sub>3</sub>): δ 9.54 (s, 1H), δ 8.38 (d, 1H), δ 8.24 (s, 1H), δ 7.89 (d, *J* = 10.0 Hz, 2H), δ 7.59-7.52 (m, 4H), δ 7.37 (d, *J* = 10.0 Hz, 2H), δ 7.29-7.26 (m, 2H), δ 2.45 (s, 3H) ppm.

### 1c. (*E*)-*N*-(2-bromo-4-fluorophenyl)-2-phenyl-2-(2-tosylhydrazono)acetamide

Solid, <sup>1</sup>H NMR (500 MHz, CDCl<sub>3</sub>): δ 8.33-8.30 (m, 1H), δ 8.00 (s, 1H), δ 7.87-7.85 (m, 2H), δ 7.55-7.45 (m, 5H), δ 7.31-7.26 (m, 2H), δ 7.11-7.07 (m, 1H), δ 2.41 (s, 3H) ppm.

### 1d. (*E*)-*N*-(2-bromo-4-methylphenyl)-2-phenyl-2-(2-tosylhydrazono)acetamide

Solid, <sup>1</sup>H NMR (500 MHz, CDCl<sub>3</sub>): δ 8.19 (m, *J* = 8.5 Hz, 1H), δ 8.03 (s, 1H), δ 7.87 (d, *J* = 8.5, 2H), δ 7.56-7.54 (m, 2H), δ 7.47-7.44 (m, 3H), δ 7.31-7.29 (m, 3H), δ 7.15-7.13 (m, 1H), δ 2.41 (s, 3H), δ 2.30 (s, 3H) ppm.

### 1e. (*E*)-*N*-(2-bromo-4,6-dimethylphenyl)-2-phenyl-2-(2-tosylhydrazono)acetamide

Solid, <sup>1</sup>H NMR (500 MHz, CDCl<sub>3</sub>): δ 8.50 (s, 1H), δ 8.18 (s, 1H), δ 7.86 (d, *J* = 8.5, 2H), δ 7.51-7.49 (m, 4H), δ 7.36 (d, *J* = 8.0 Hz, 2H), δ 7.30-7.26 (m, 3H), δ 7.00 (s, 1H), δ 2.46 (s, 3H), δ 2.29 (s, 3H), δ 2.22 (s, 3H) ppm.

### 1f. (*E*)-*N*-(2-bromo-5-(trifluoromethyl)phenyl)-2-phenyl-2-(2-tosylhydrazono)acetamide

Solid, <sup>1</sup>H NMR (500 MHz, CDCl<sub>3</sub>): δ 9.70 (s, 1H), δ 8.78 (s, 1H), δ 8.27 (s, 1H), δ 7.89 (d, *J* = 8.0 Hz, 2H), δ 7.55-7.53 (m, 3H), δ 7.37 (d, *J* = 8.0 Hz, 2H), δ 7.28-7.26 (m, 2H), δ 7.25-7.23 (m, 1H), δ 2.45 (s, 3H) ppm.

### 1g. (*E*)-*N*-(2-iodophenyl)-2-phenyl-2-(2-tosylhydrazono)acetamide

Solid, <sup>1</sup>H NMR (500 MHz, CDCl<sub>3</sub>): δ 9.41 (s, 1H), δ 8.33-8.21 (m, 2H), δ 7.93-7.81 (m, 3H), δ 7.54-7.51 (m, 3H), δ 7.36-7.26 (m, 5H), δ 6.86-6.83 (m, 1H), δ 2.44 (s, 3H) ppm.

### 1h. Mixture of (*Z*) & (*E*)-*N*,2-diphenyl-2-(2-tosylhydrazono)acetamide

Solid (Trans: Cis = 1.5:1), <sup>1</sup>H NMR (500 MHz, CDCl<sub>3</sub>): δ 8.83 (s, 1H), δ 8.15 (s, 1H), δ 7.86-7.81 (m, 3H), δ 7.59-7.50 (m, 6H), δ 7.44-7.43 (m, 2H), δ 7.38-7.28 (m, 6H), δ 7.24-7.13 (m, 3H), δ 2.45 (s, 3H), δ 2.40 (s, 2H) ppm.

# Copies of <sup>1</sup>H NMR spectra of compounds (1a-1h)

## <sup>1</sup>H NMR spectra of 1a

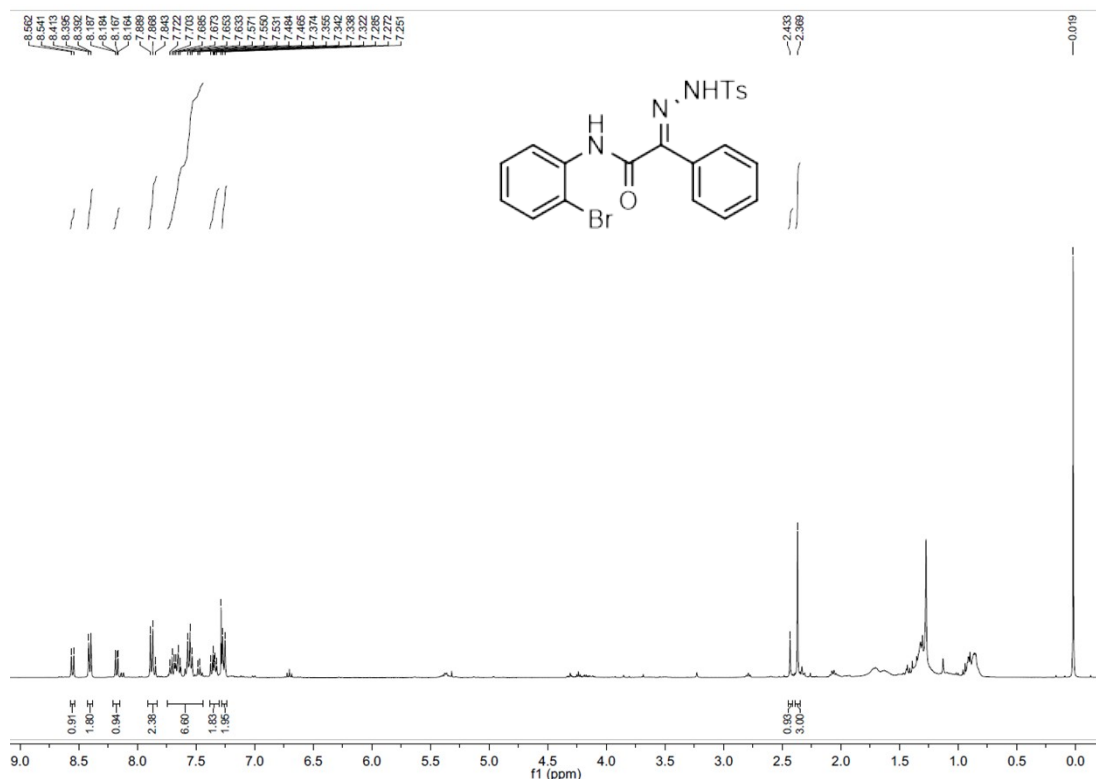

## <sup>1</sup>H NMR spectra of 1b

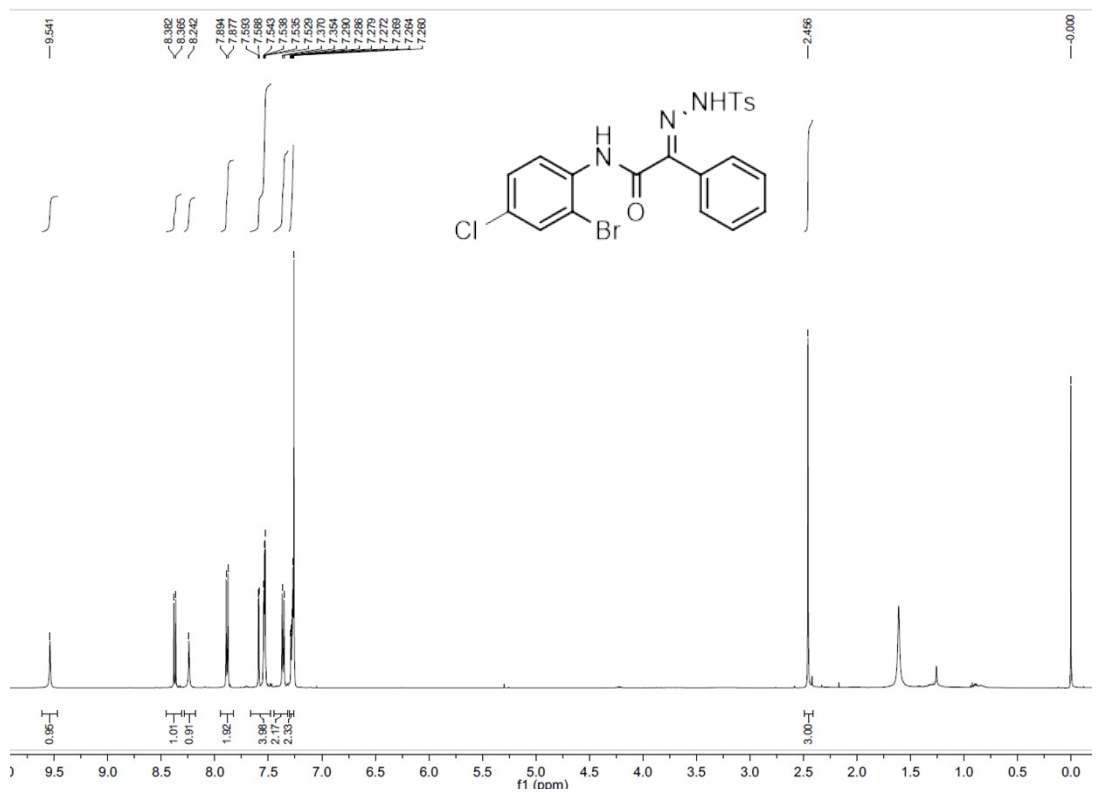



### <sup>1</sup>H NMR spectra of 1c

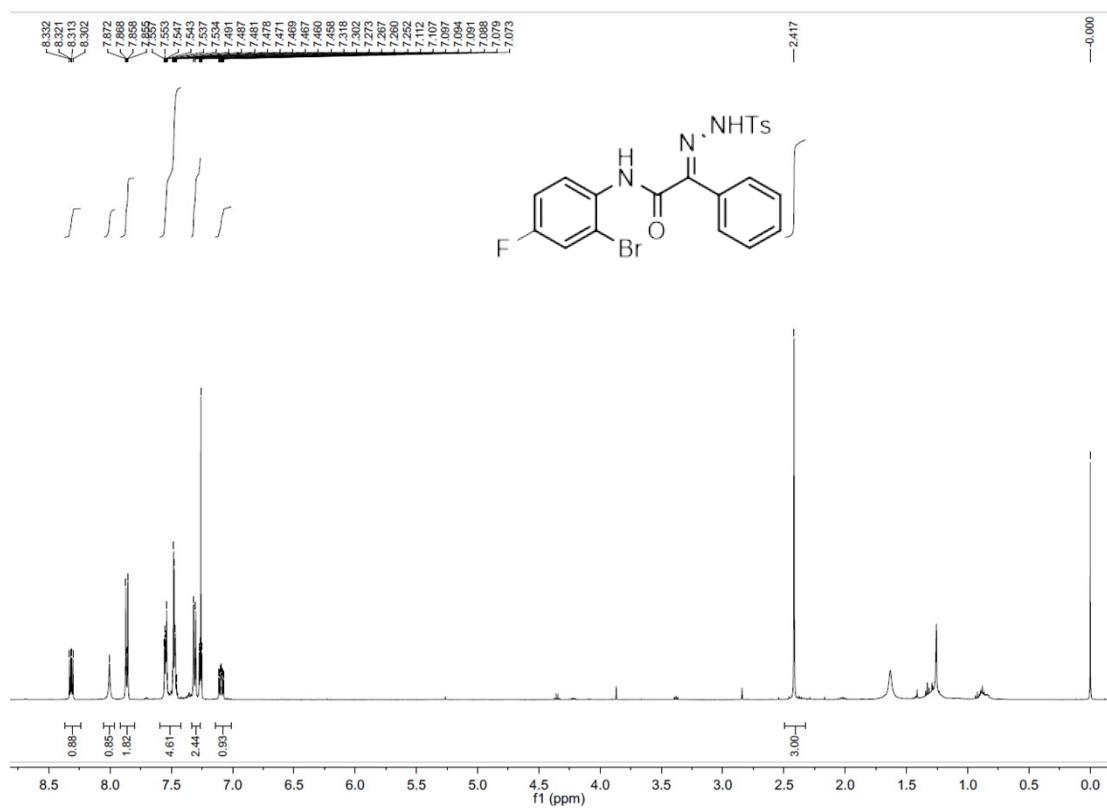

### <sup>1</sup>H NMR spectra of 1d

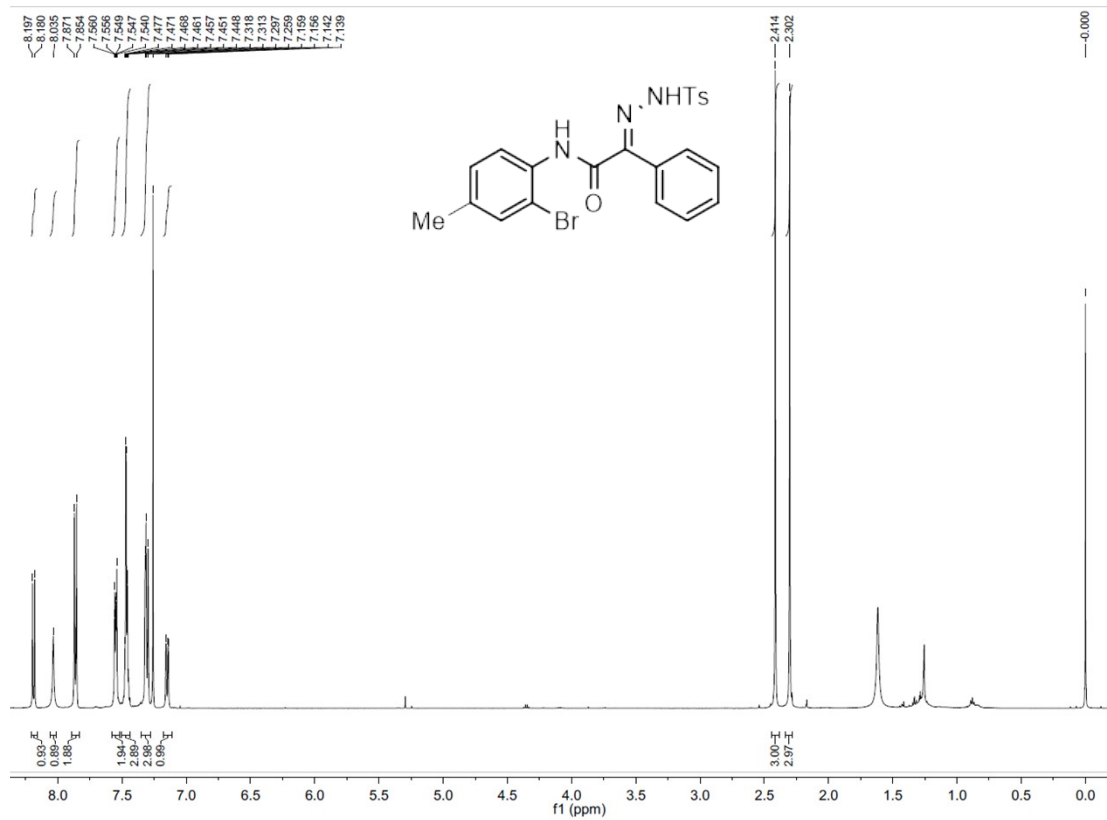

### <sup>1</sup>H NMR spectra of 1e

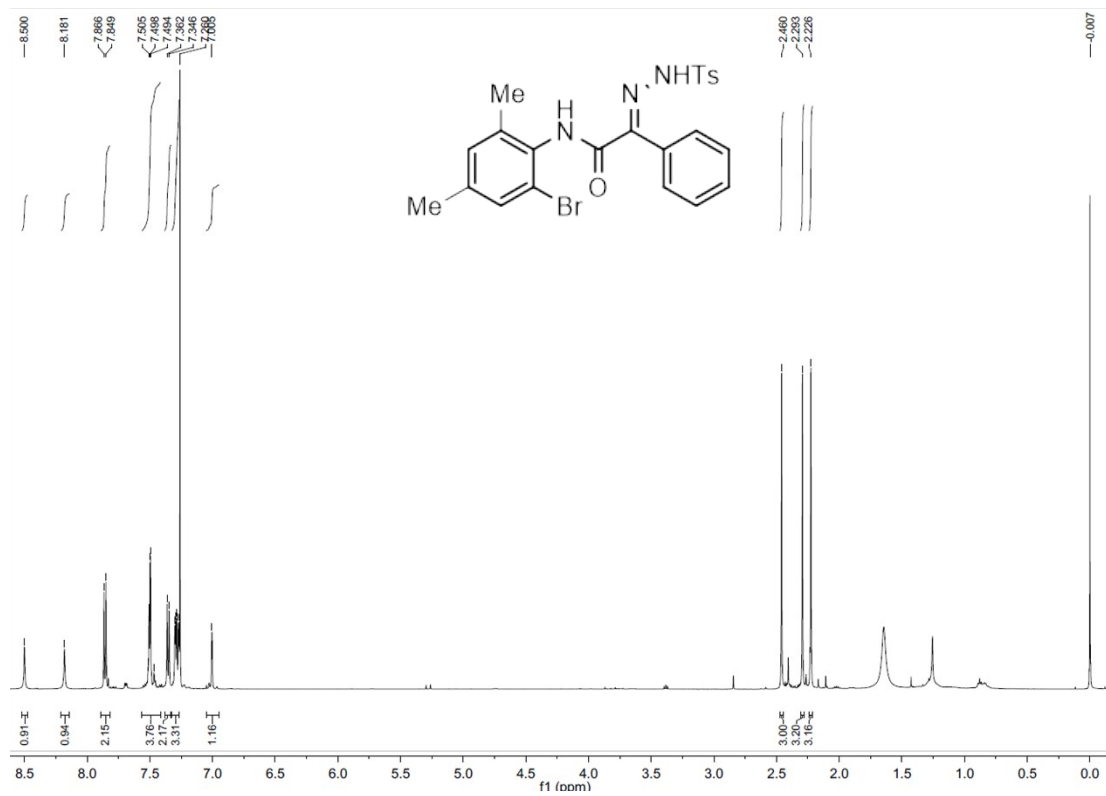

### <sup>1</sup>H NMR spectra of 1f

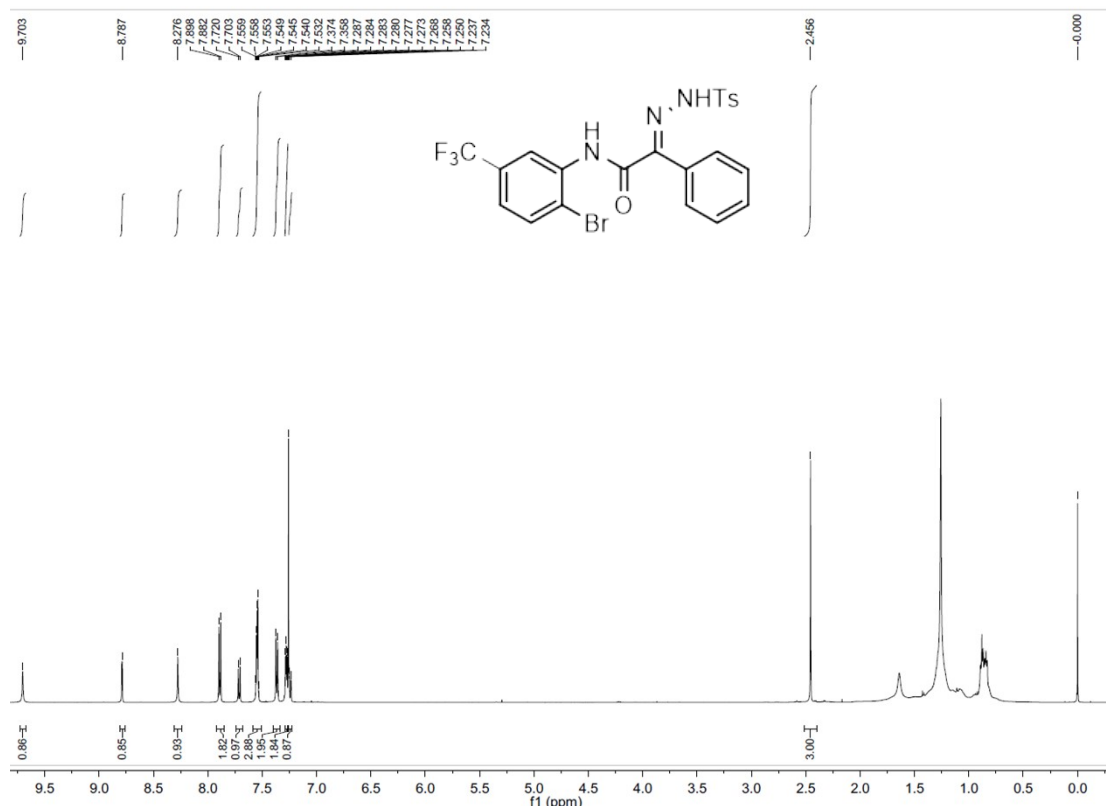

### <sup>1</sup>H NMR spectra of 1g

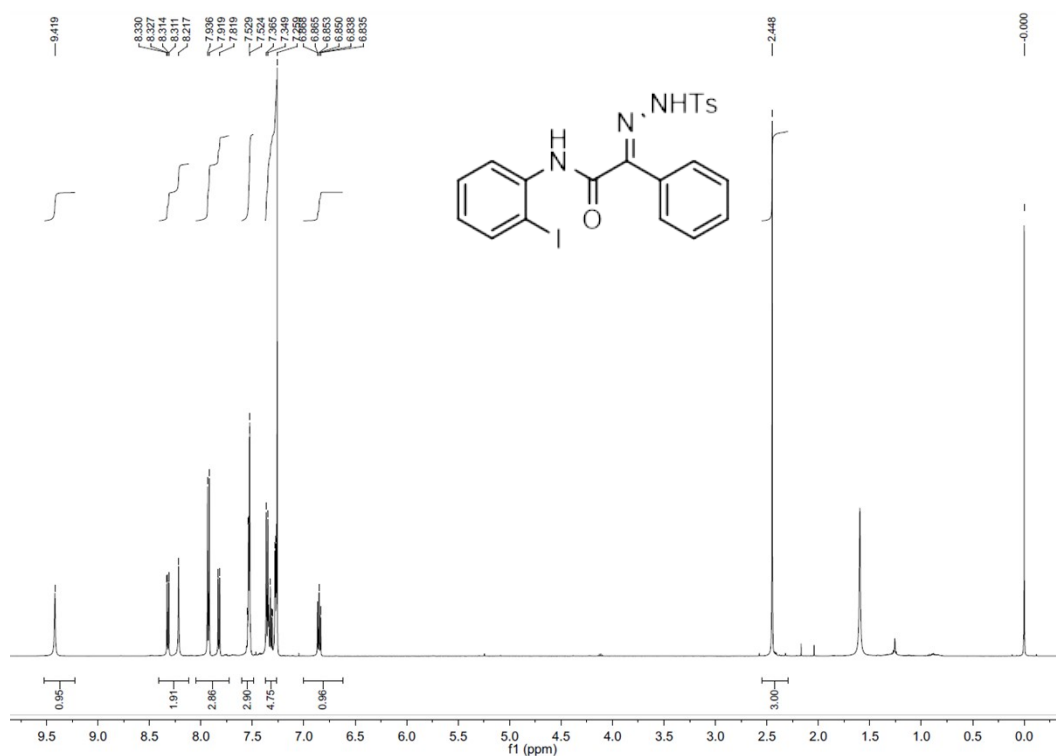

### <sup>1</sup>H NMR spectra of 1h

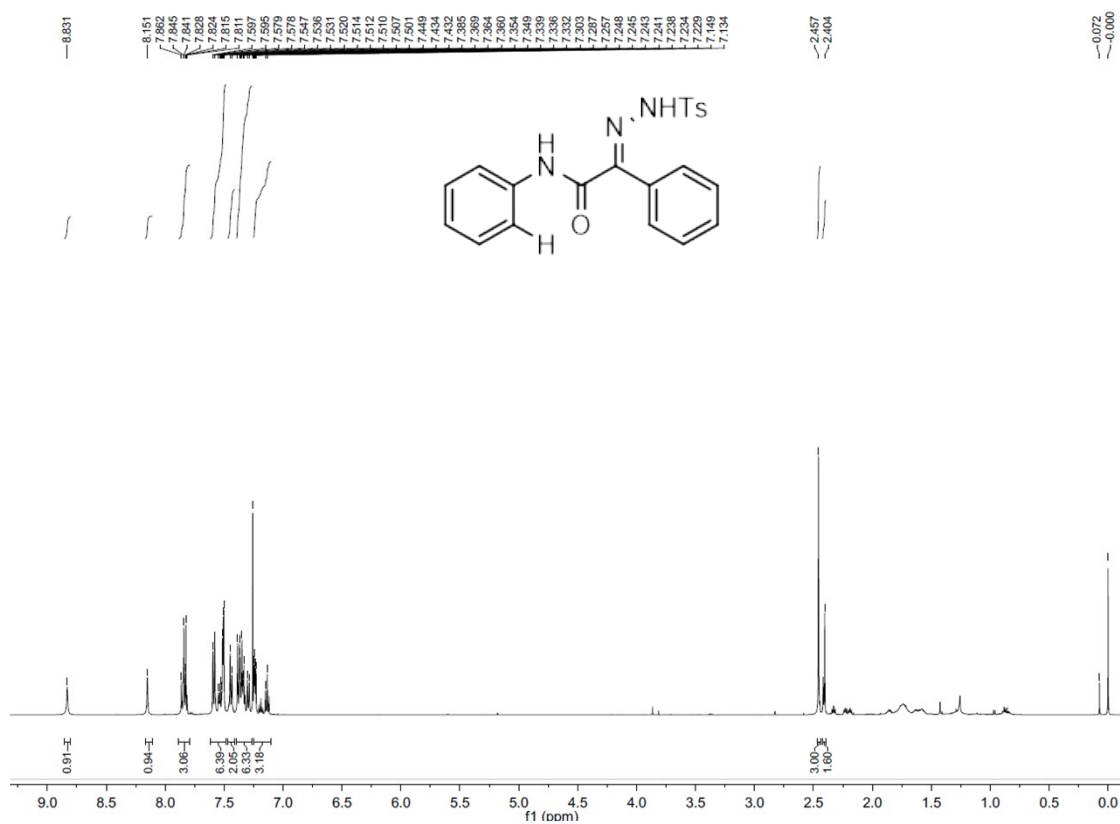

# Copy of NMR spectra of synthesized compounds (3a-3m)

## <sup>1</sup>H NMR and <sup>13</sup>C NMR spectra of 3a

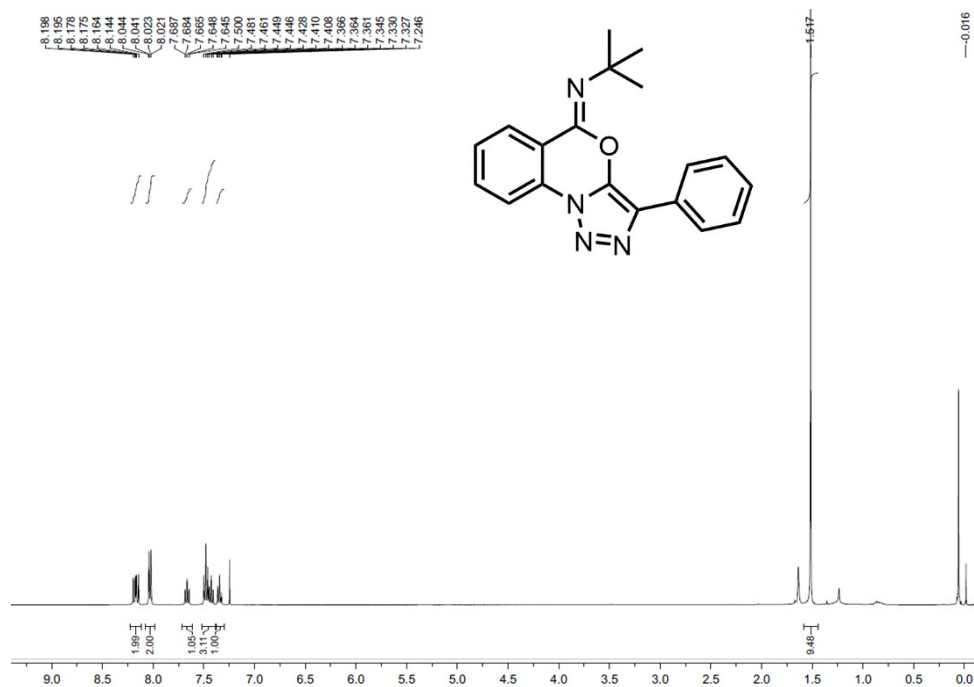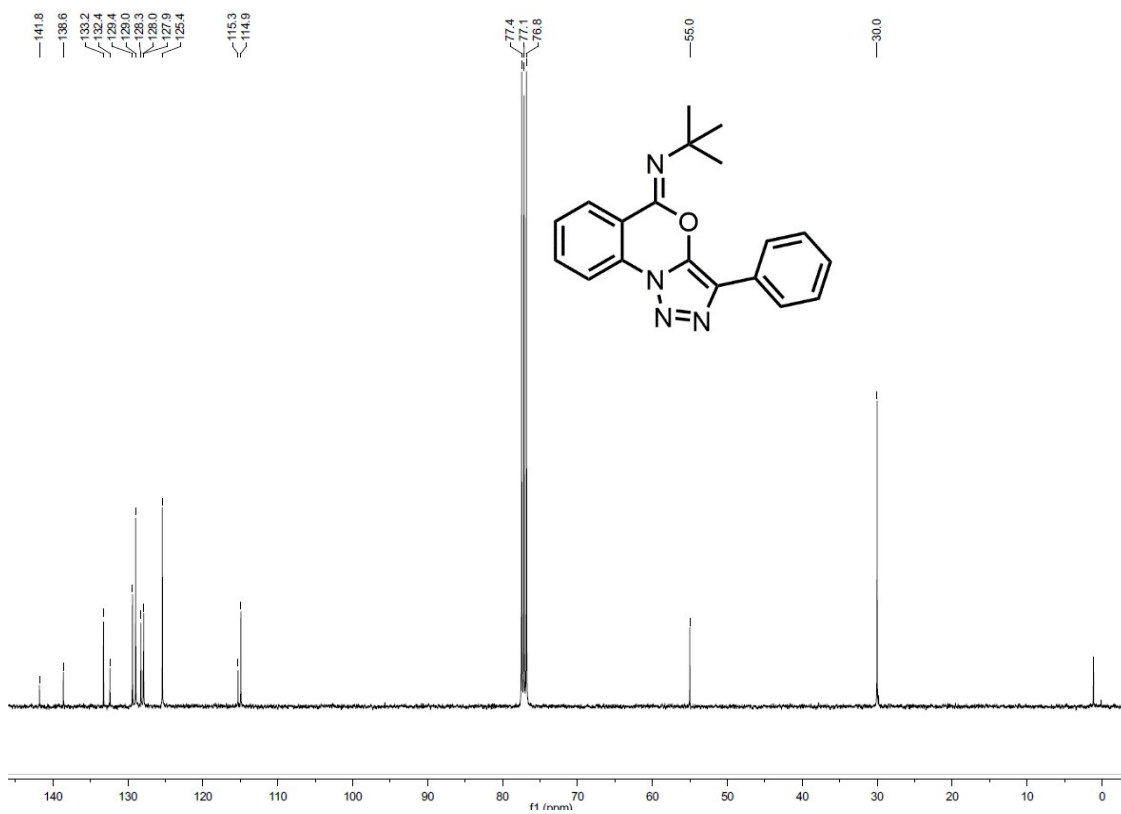

# <sup>1</sup>H NMR and <sup>13</sup>C NMR spectra of 3b

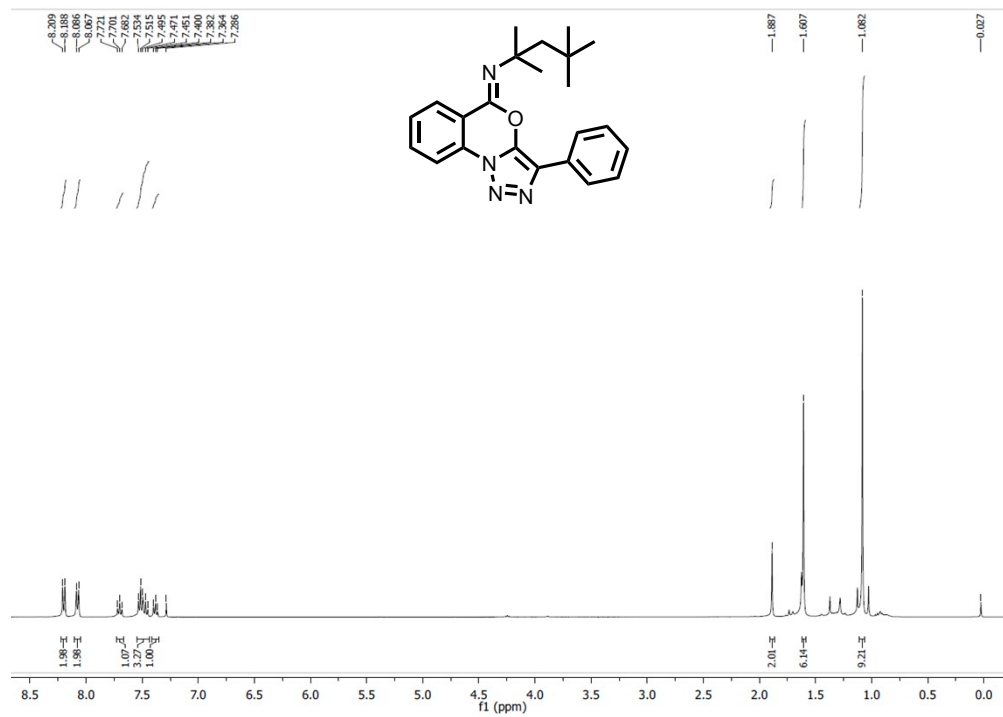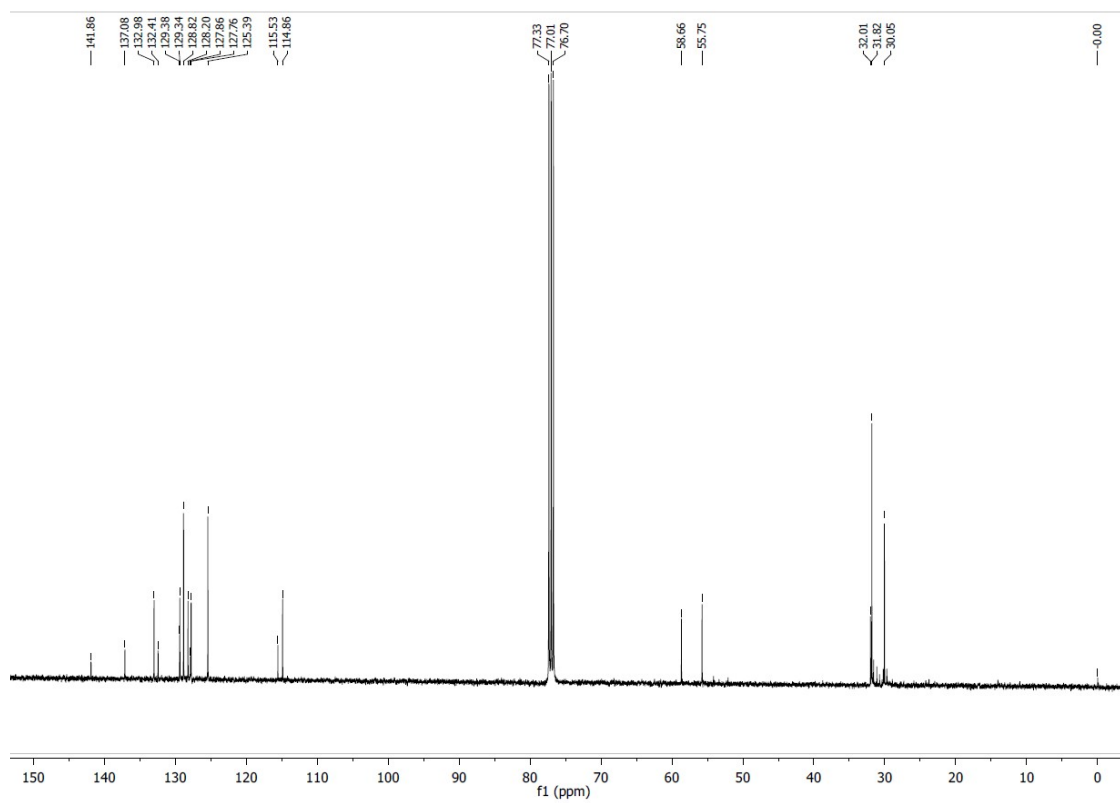

# <sup>1</sup>H NMR and <sup>13</sup>C NMR spectra of 3c

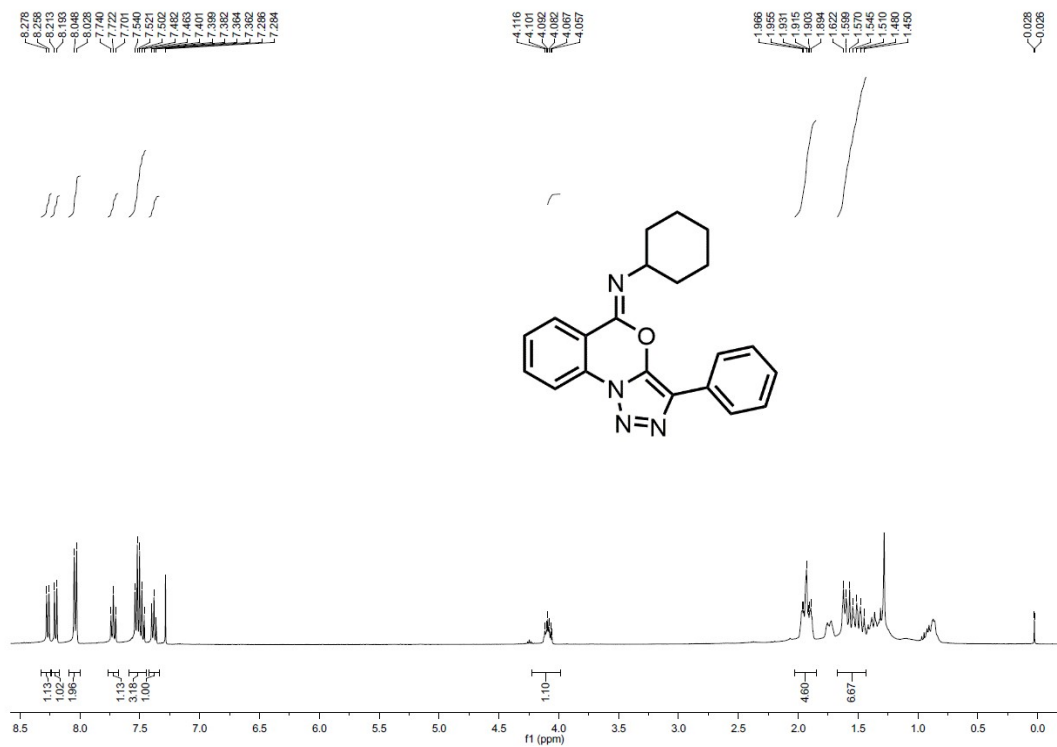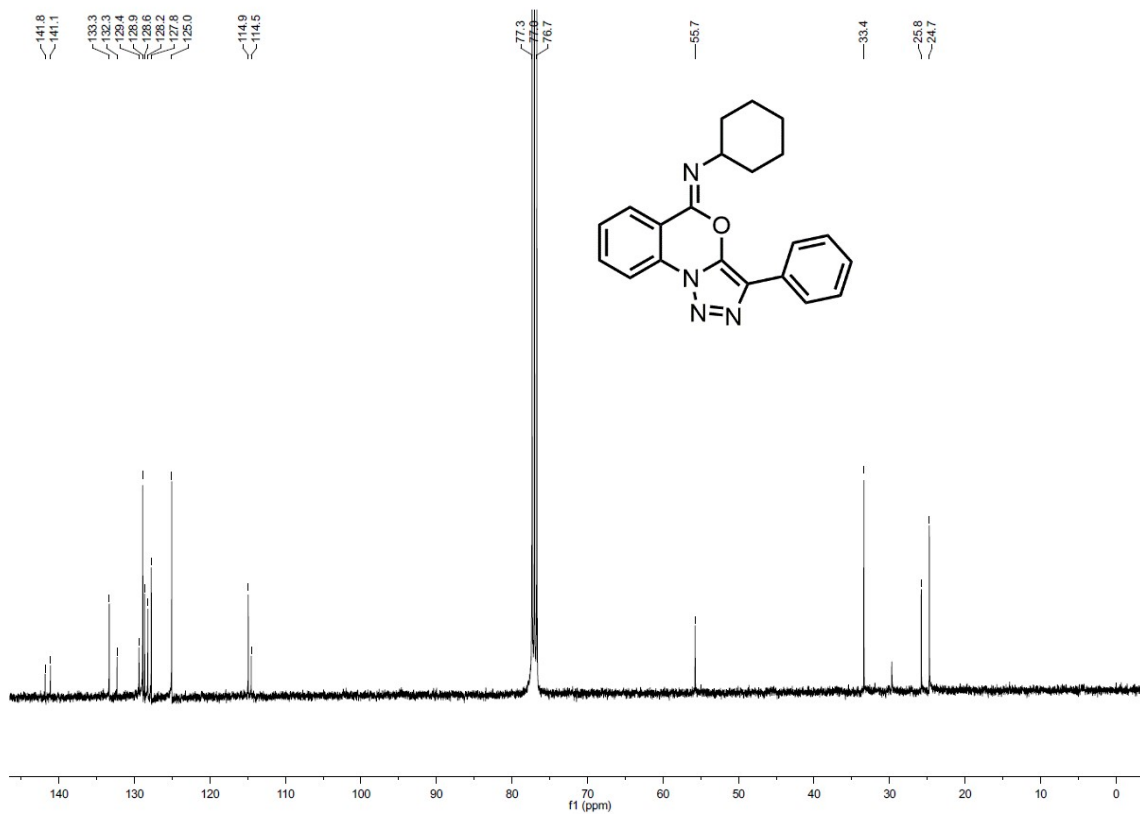

# <sup>1</sup>H NMR and <sup>13</sup>C NMR spectra of 3d

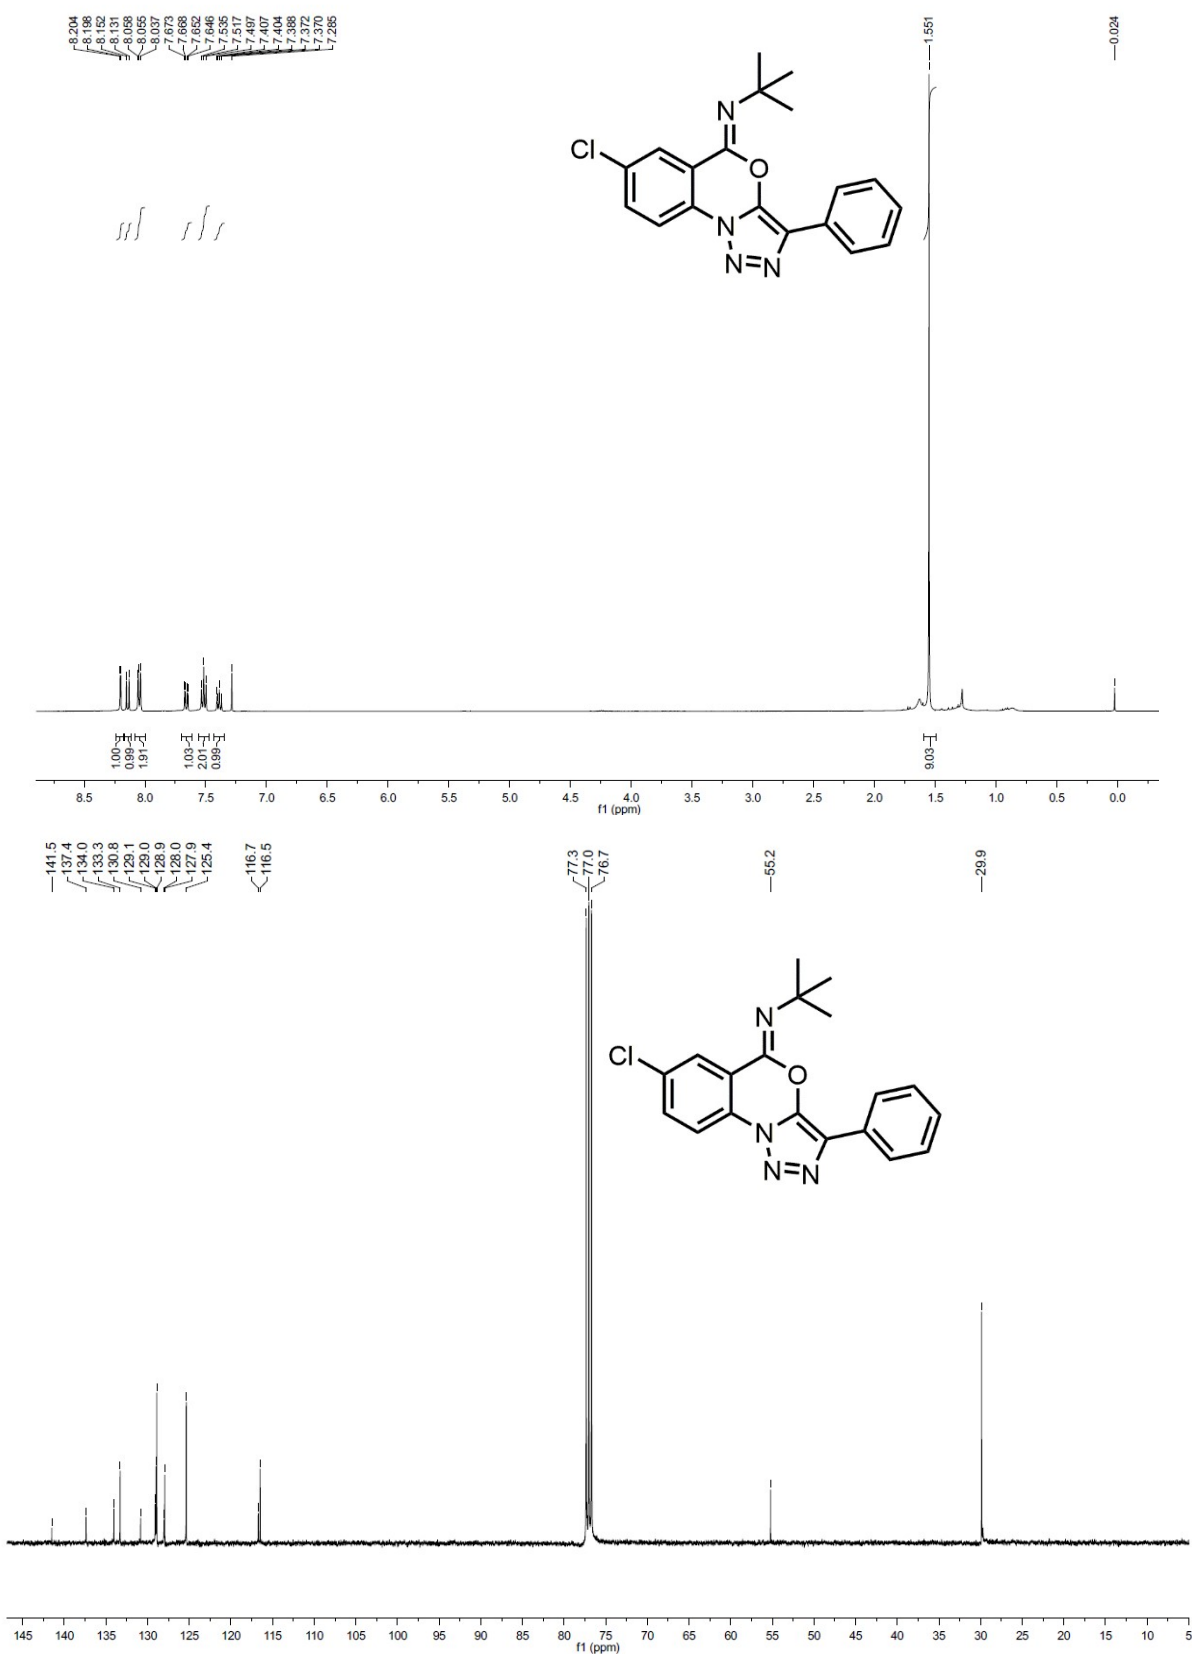

# <sup>1</sup>H NMR and <sup>13</sup>C NMR spectra of 3e

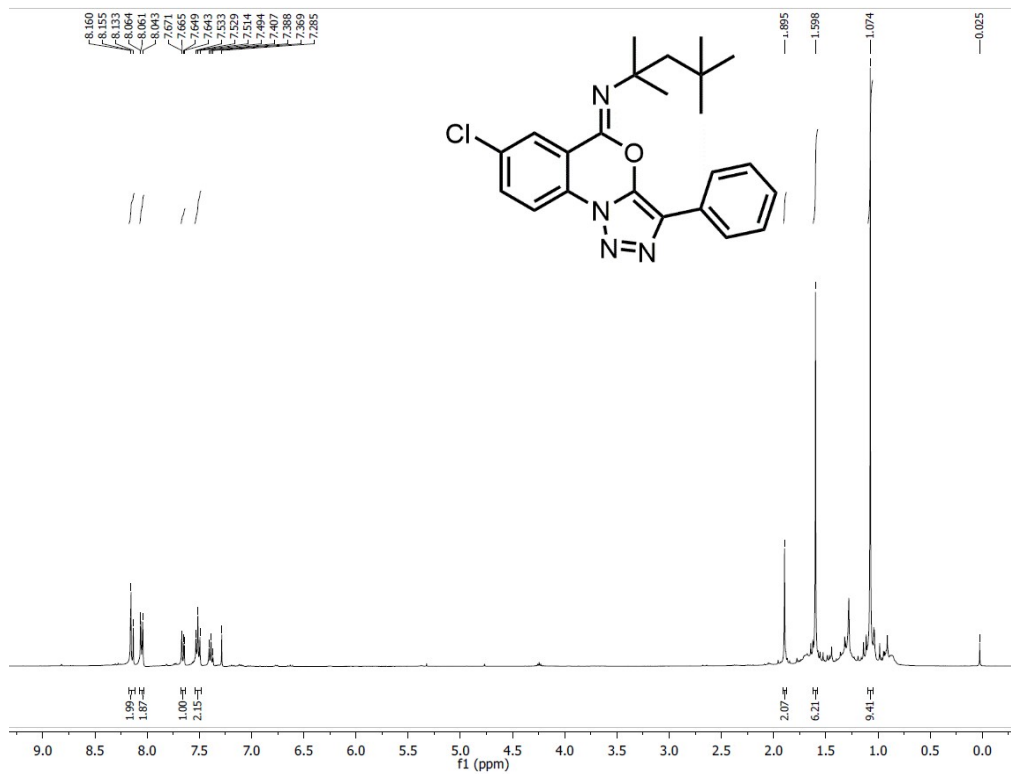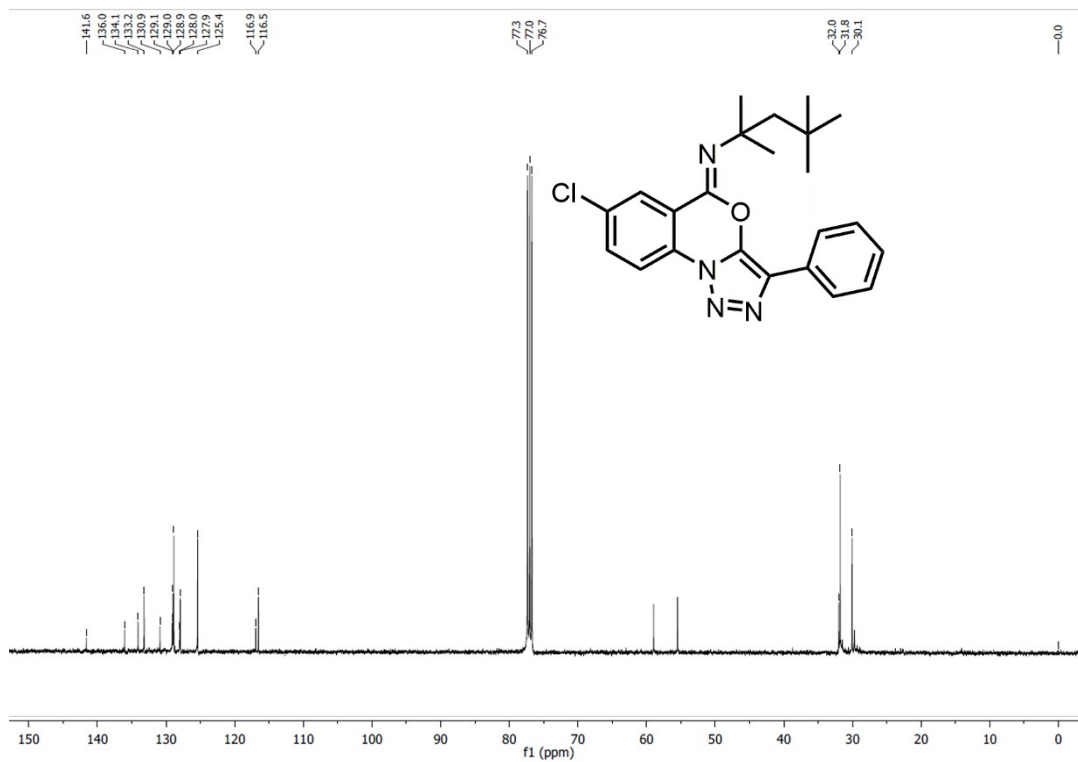



# <sup>1</sup>H NMR and <sup>13</sup>C NMR spectra of 3f

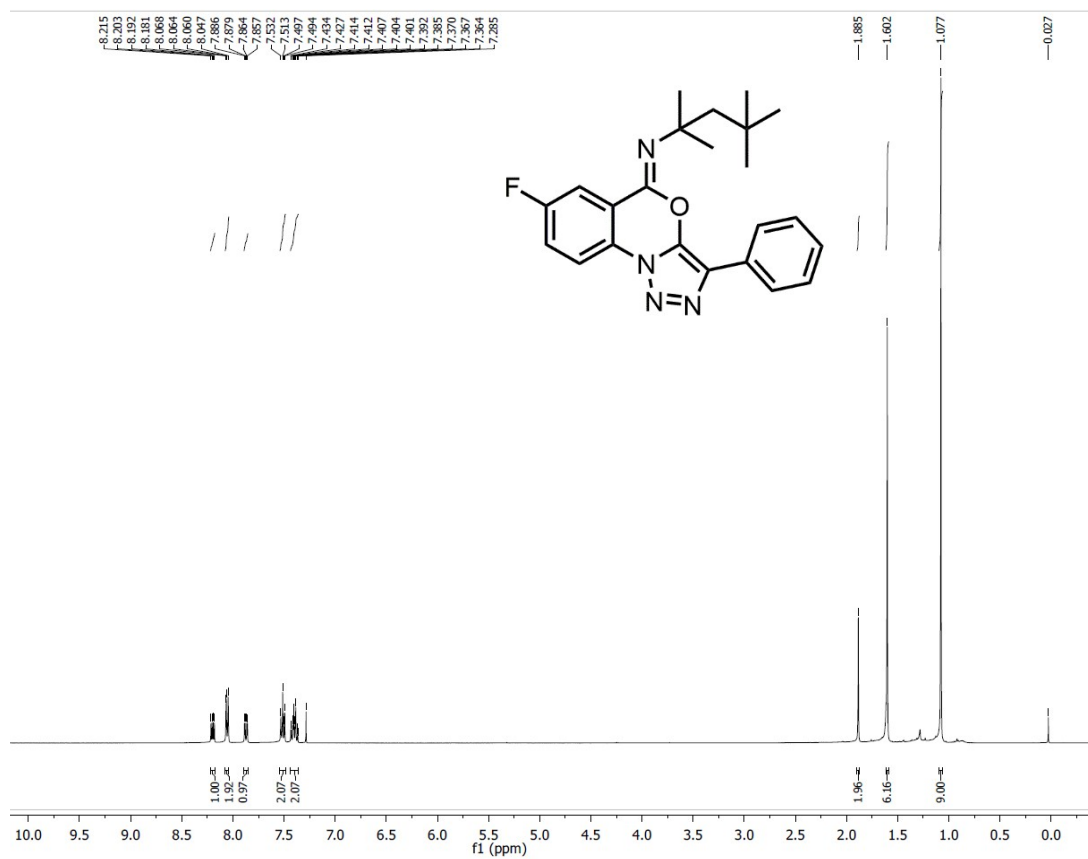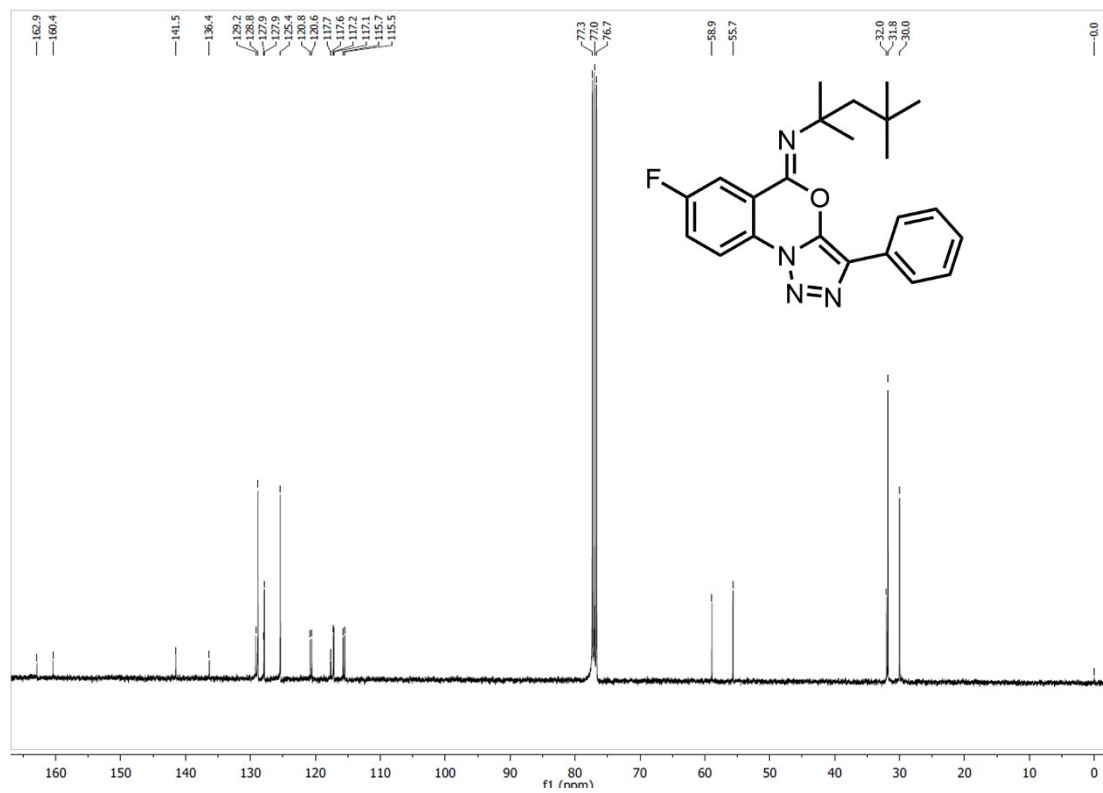

# <sup>1</sup>H and <sup>13</sup>C NMR spectra of 3g

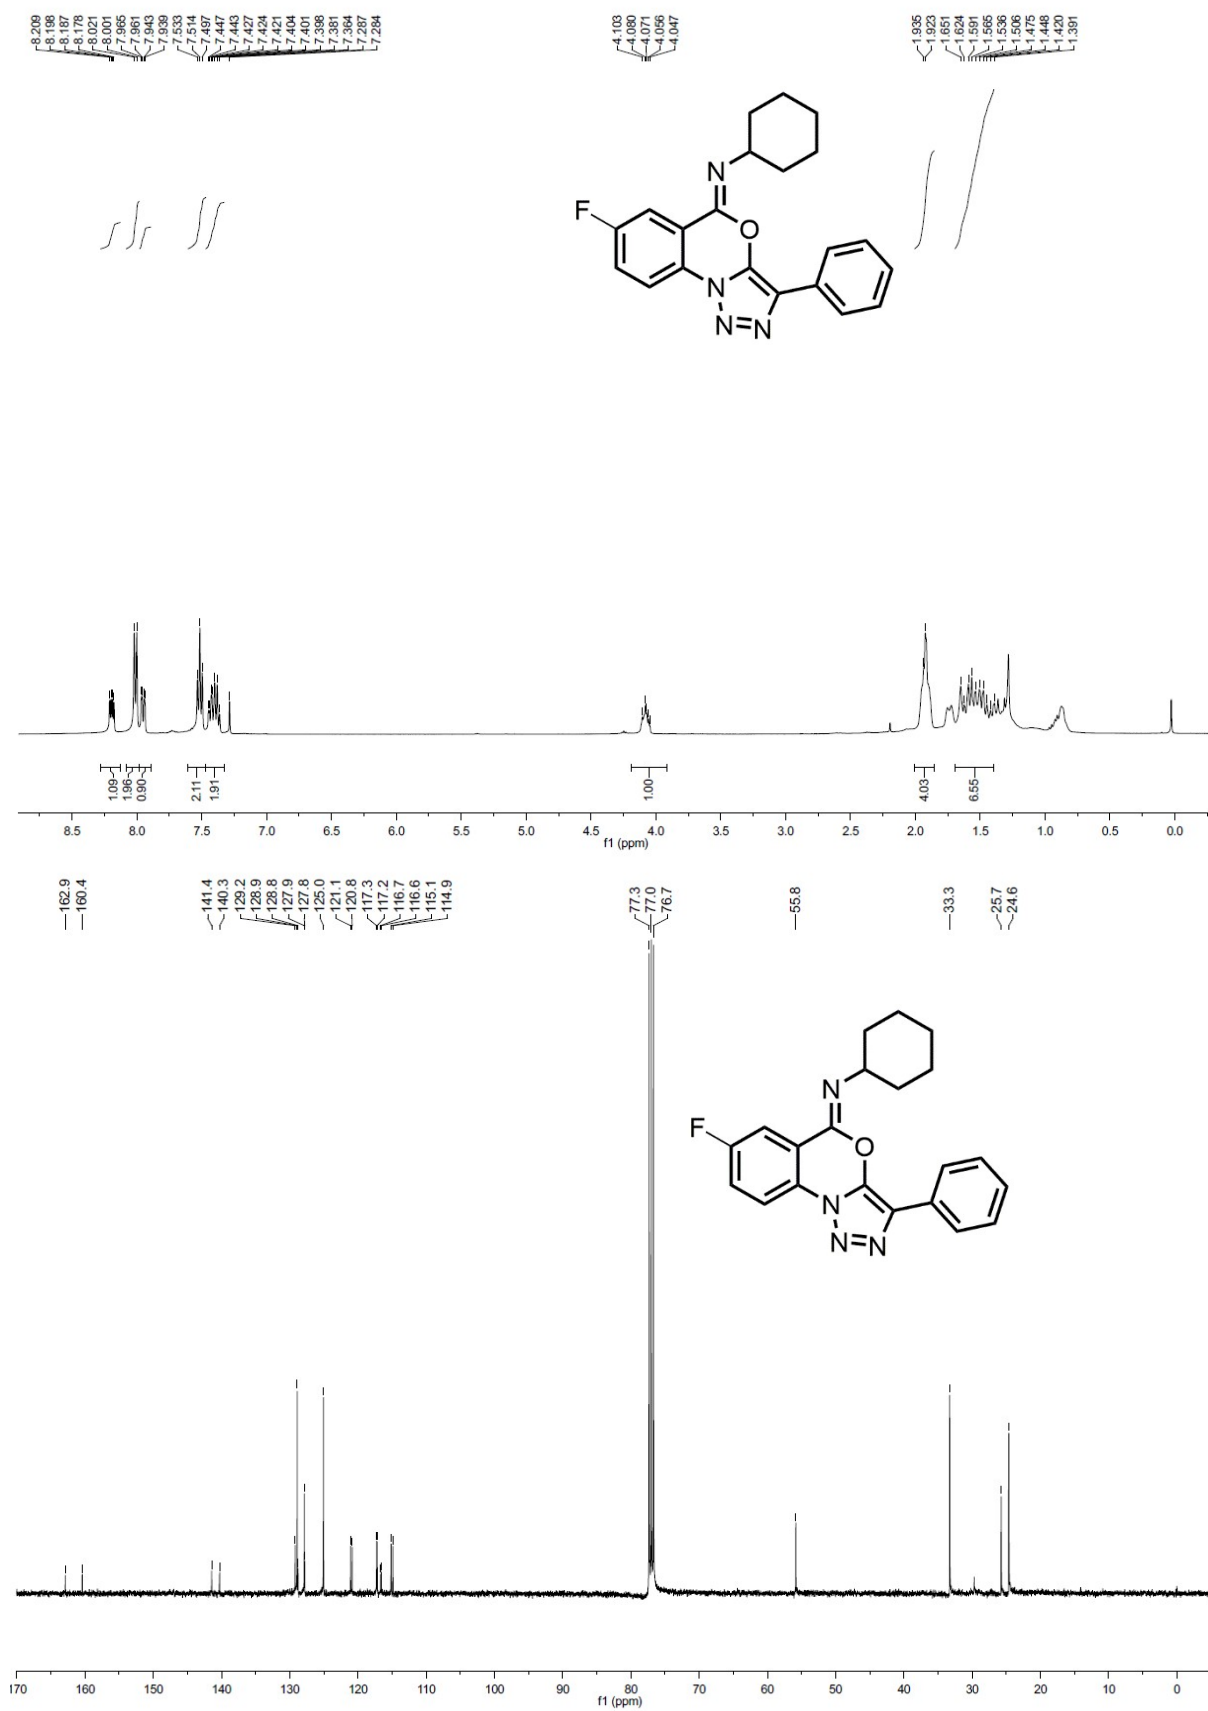

### $^1\text{H}$ and $^{13}\text{C}$ NMR spectra of 3h

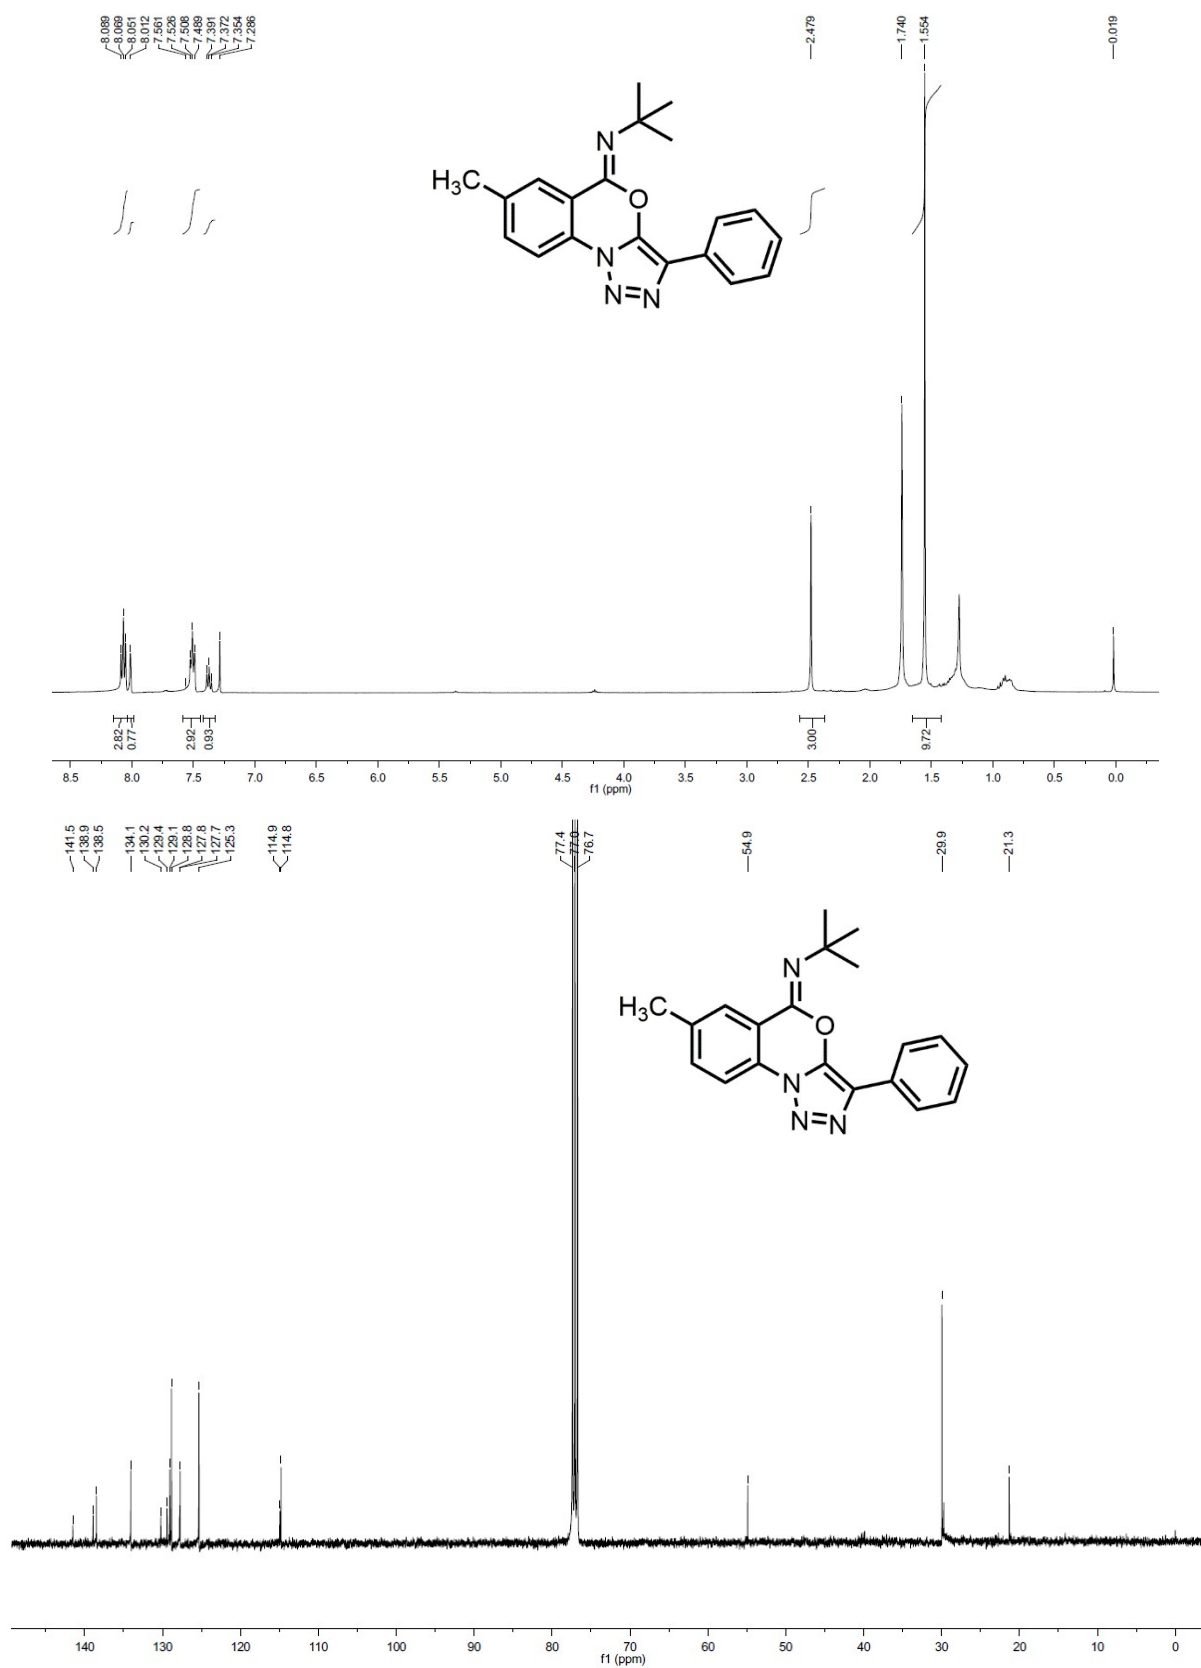

### $^1\text{H}$ and $^{13}\text{C}$ NMR spectra of 3i

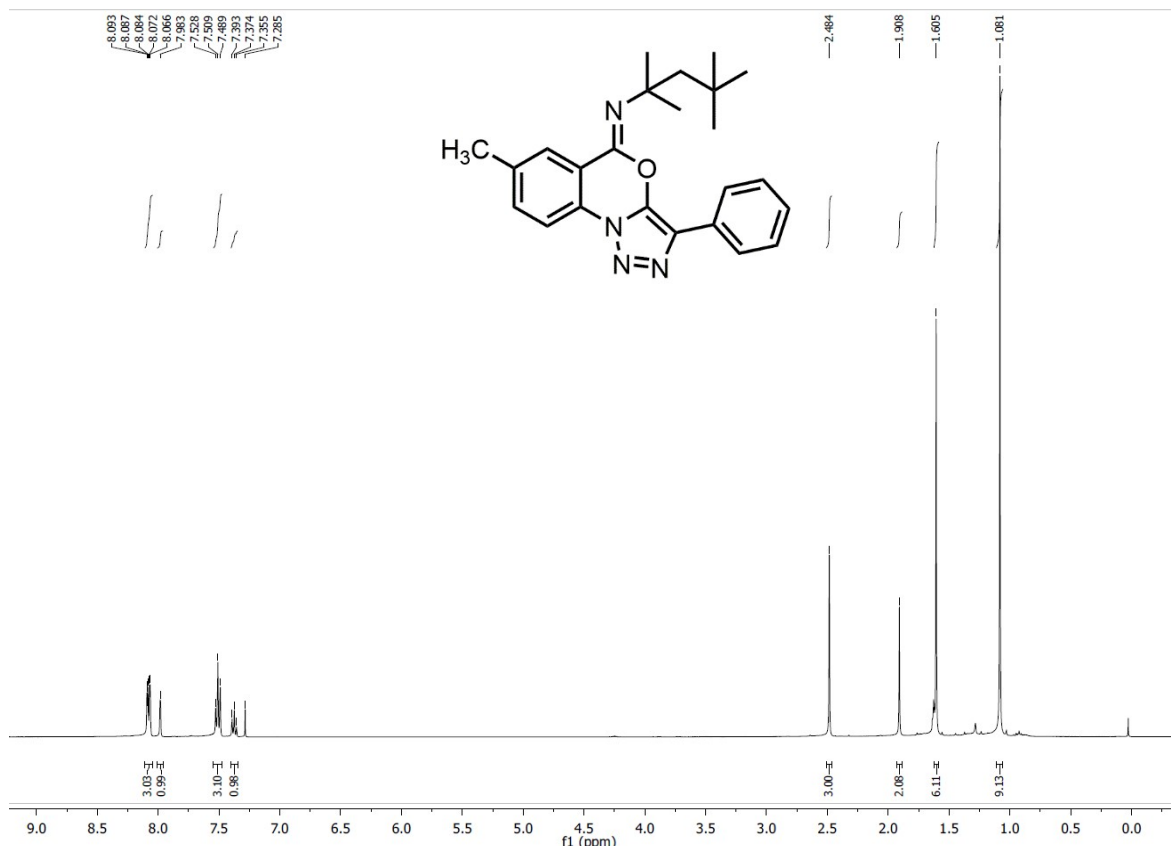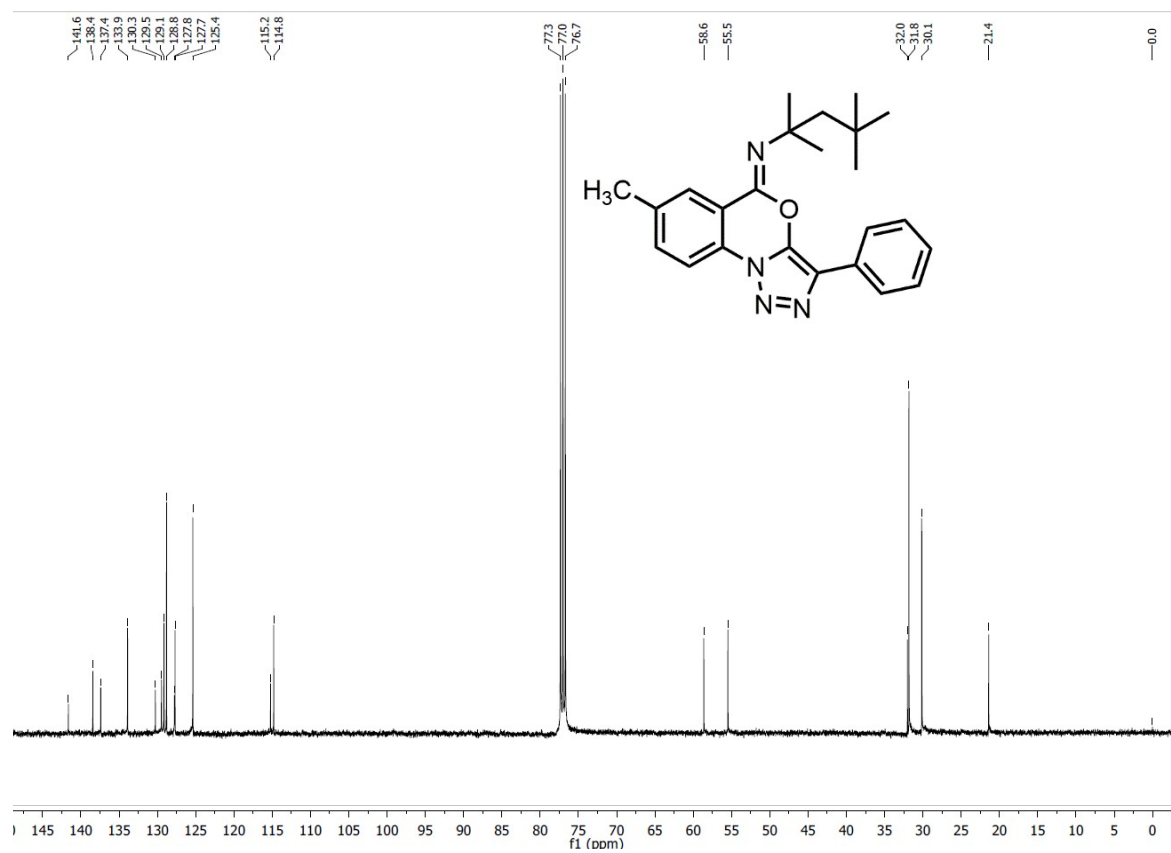

**<sup>1</sup>H and <sup>13</sup>C NMR spectra of 3j**

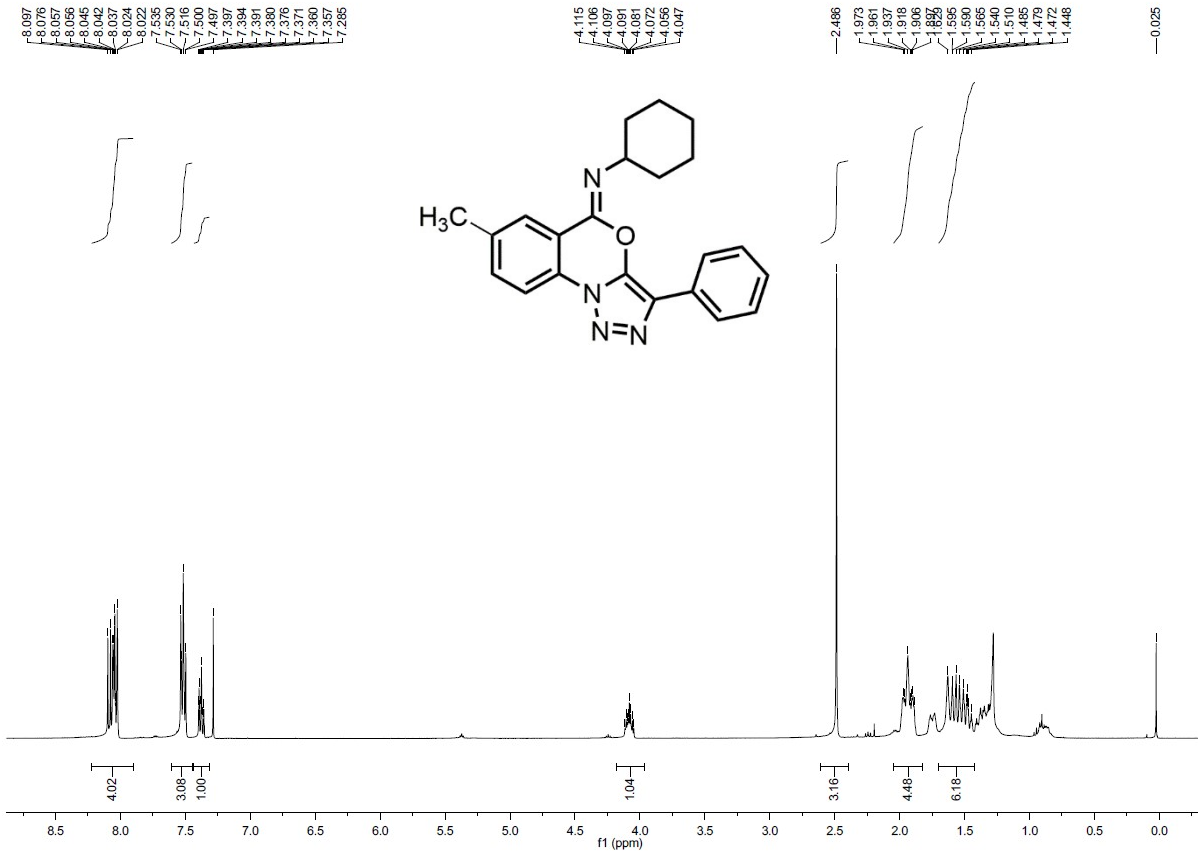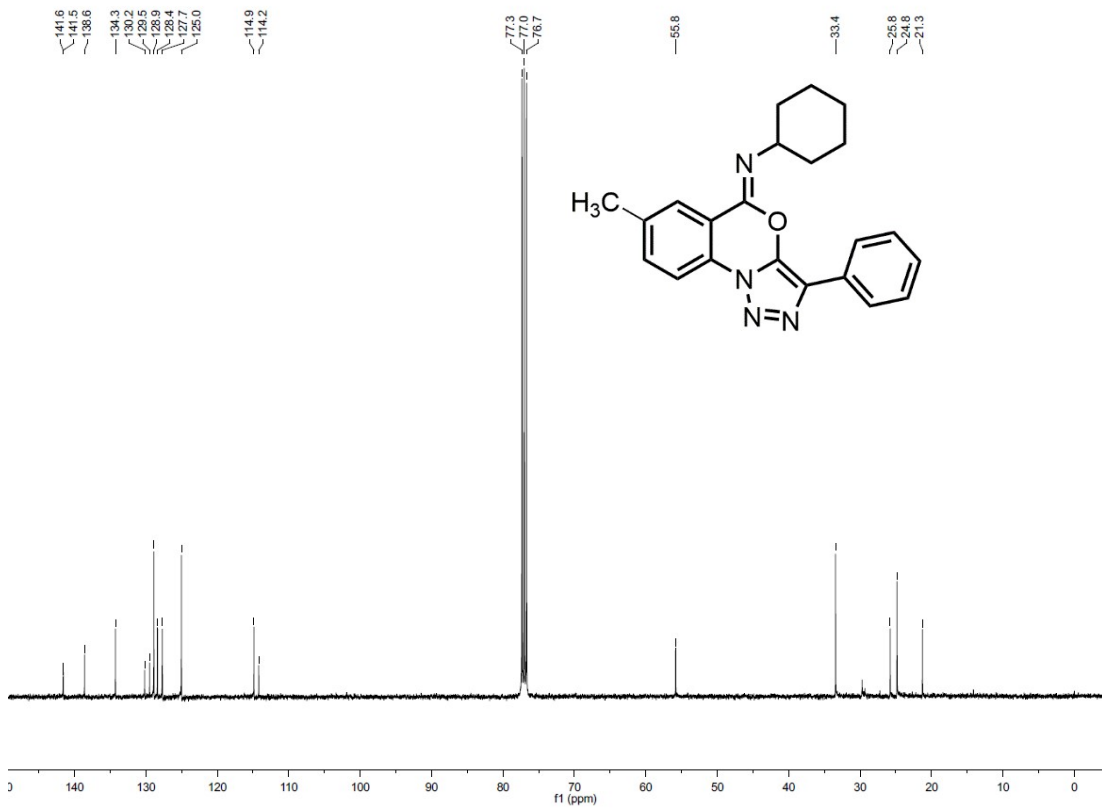

# <sup>1</sup>H and <sup>13</sup>C NMR spectra of 3k

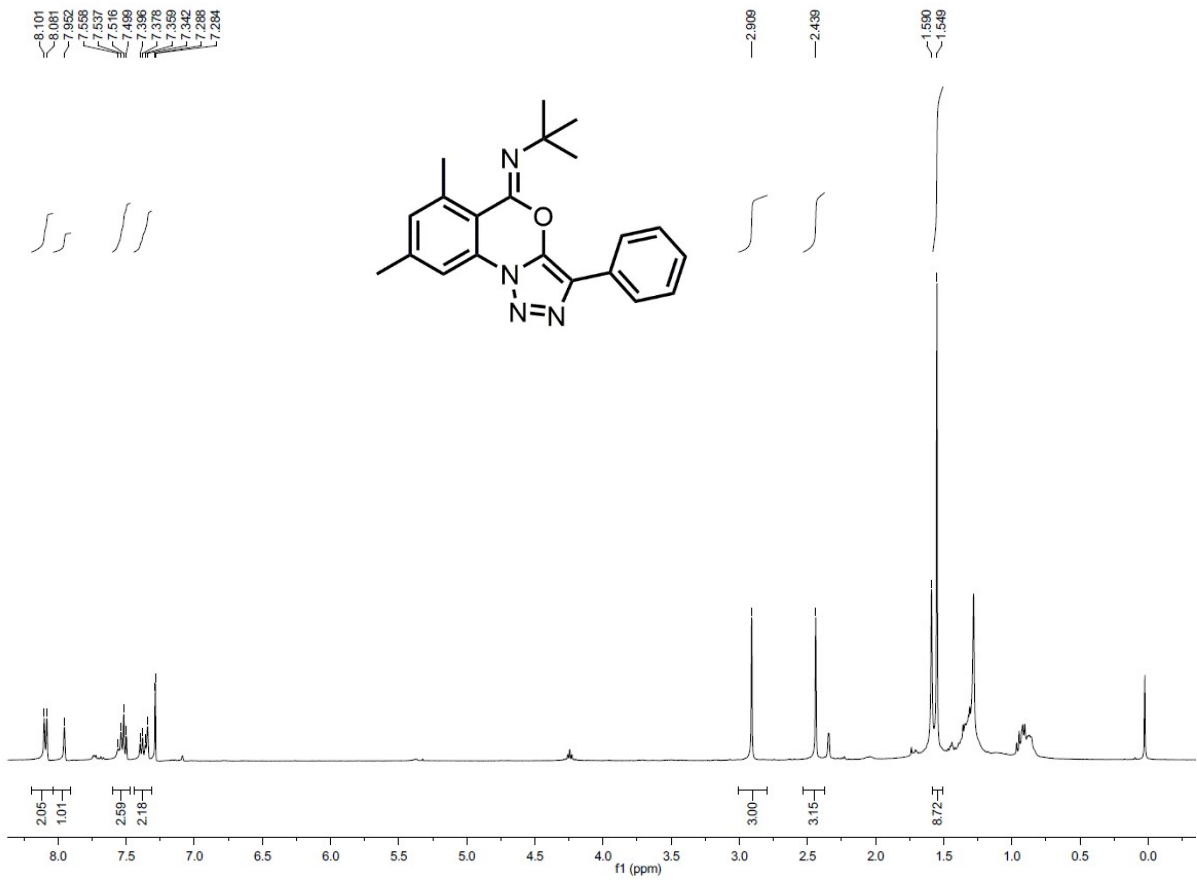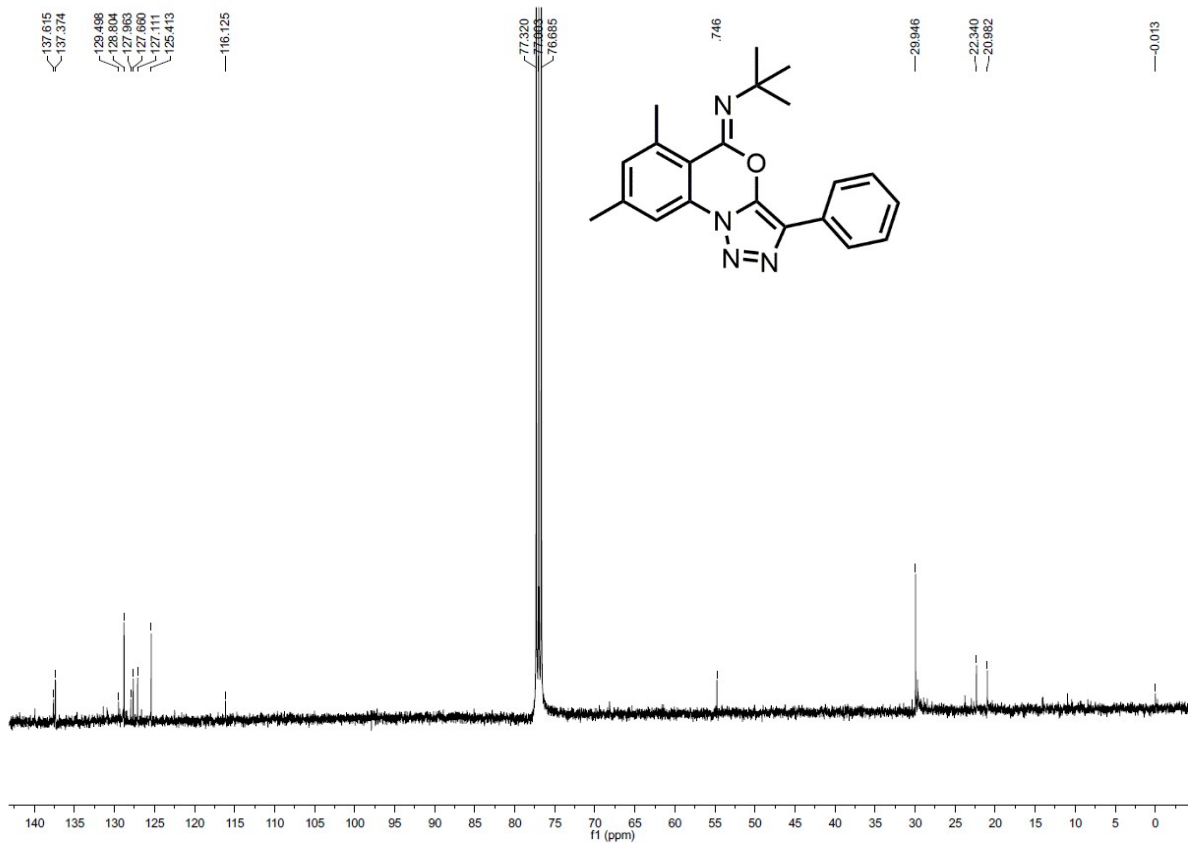

### <sup>1</sup>H and <sup>13</sup>C NMR spectra of 3l

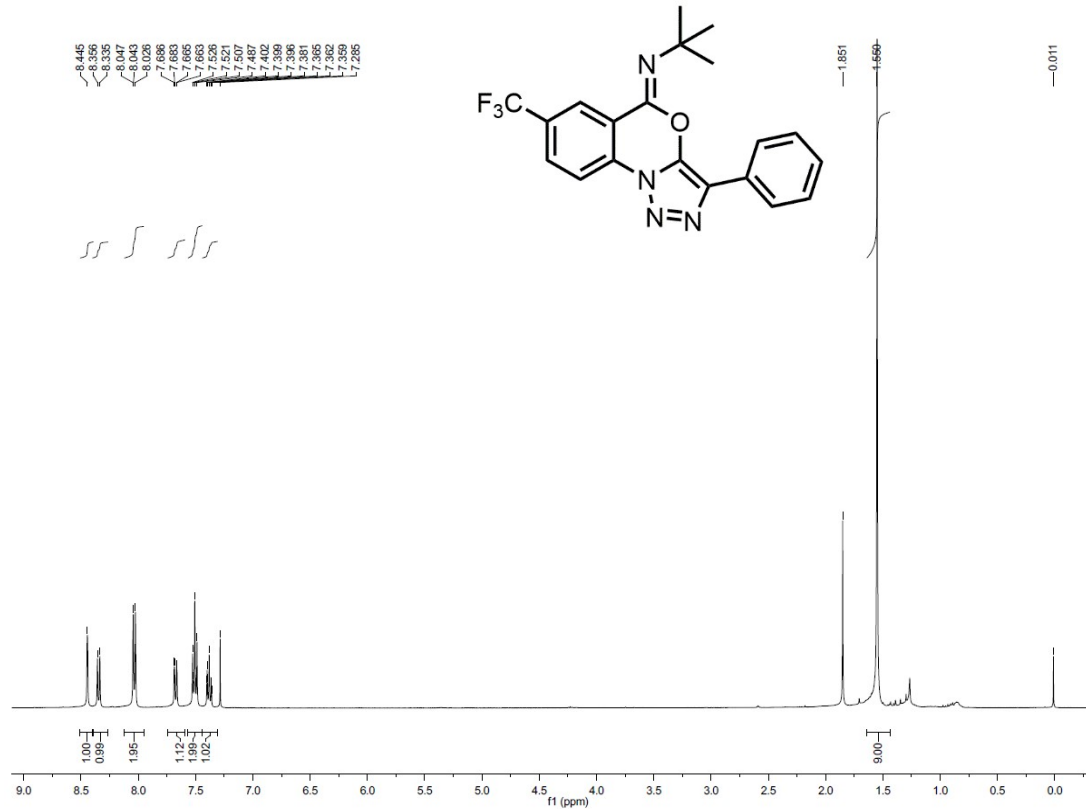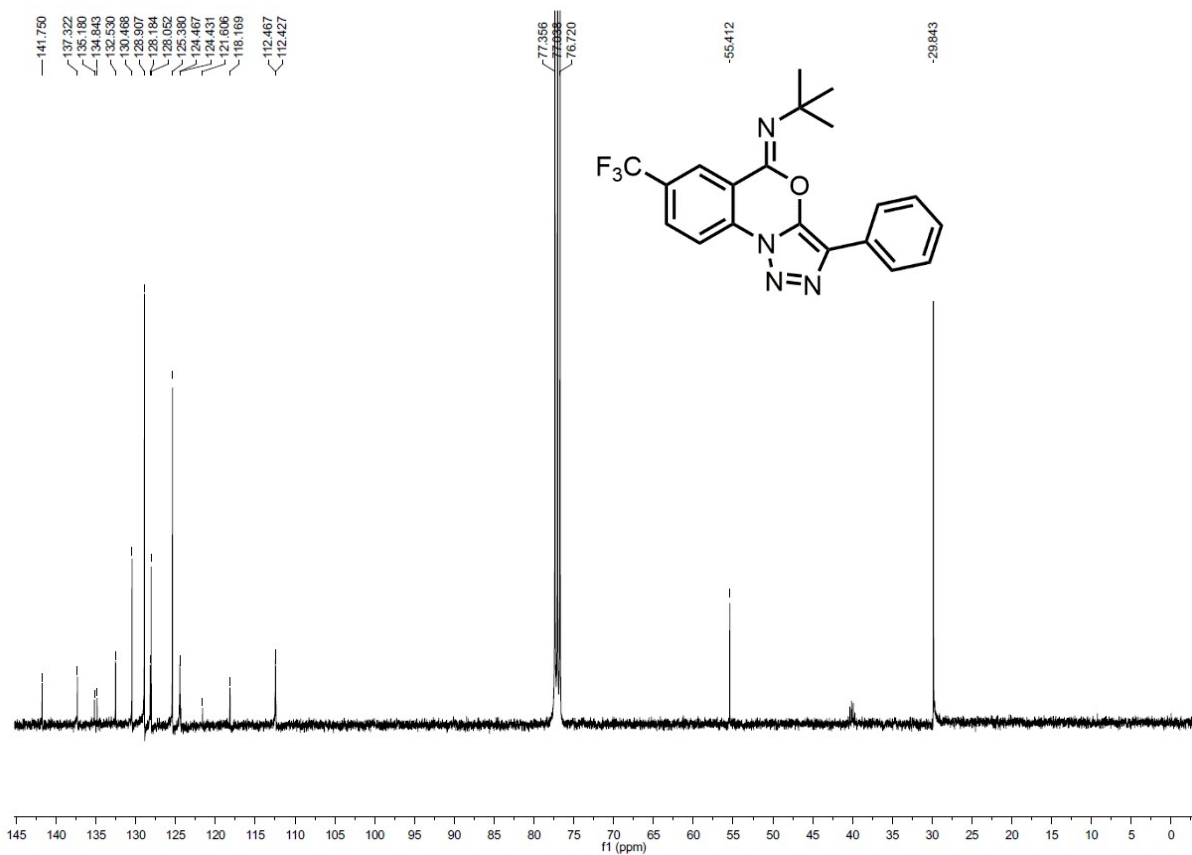

### <sup>1</sup>H and <sup>13</sup>C NMR spectra of 3m

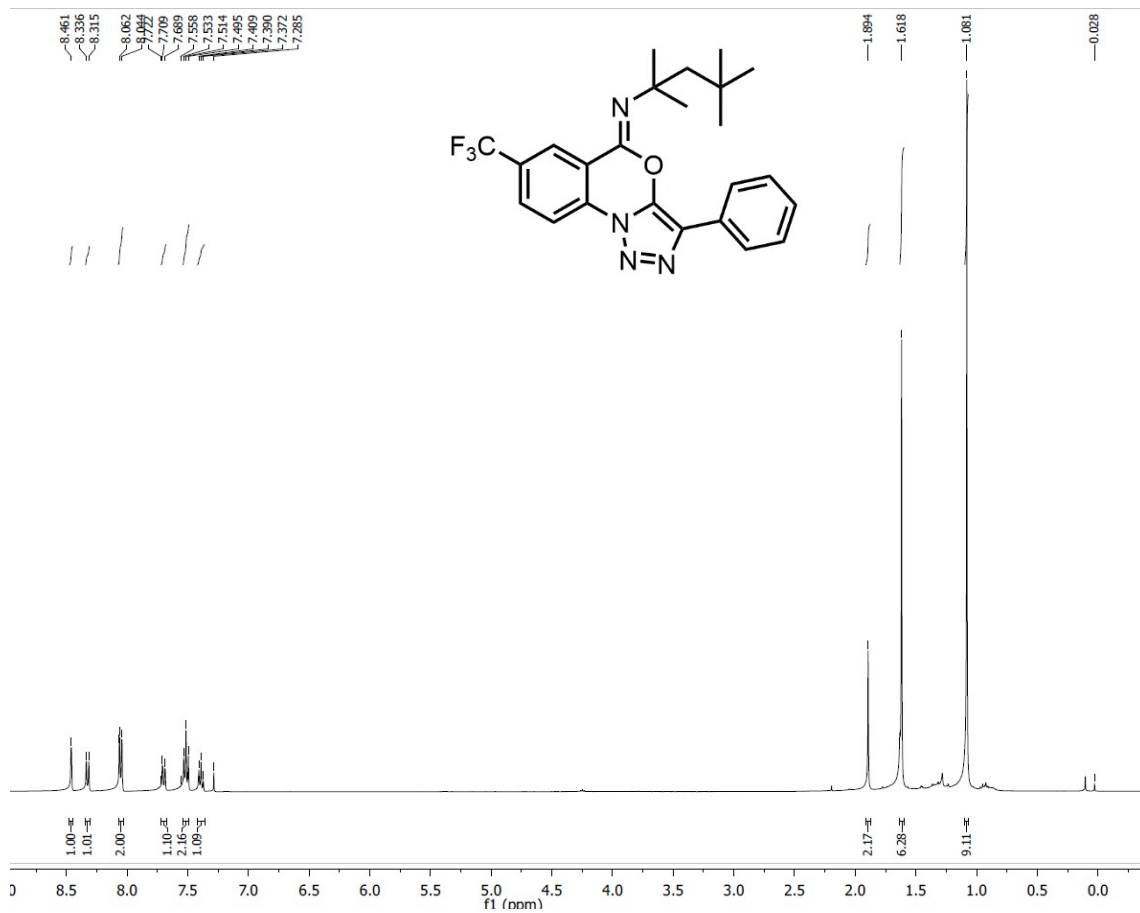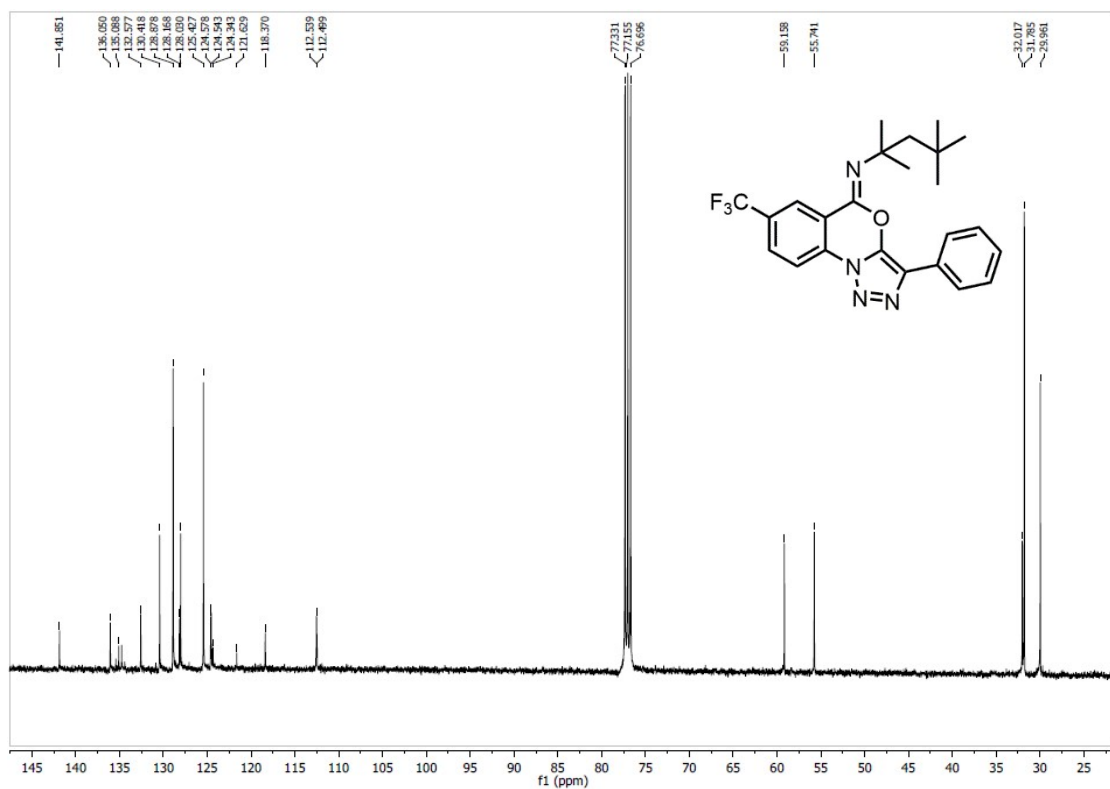



### Comparison of theoretical and experimental NMR data of N-(tert-butyl)-5H-benzo[d][1,2,3] triazolo[5,1-b] [1,3] oxazin-5-imine (3a)

Experimentally  $^1\text{H}$  NMR and  $^{13}\text{C}$  NMR of title compound was evaluated in  $\text{CDCl}_3$  solvent using TMS as an internal standard. Theoretically it was calculated in PCM with Chloroform as solvent using GIAO method involving B3LYP/6-31+G\*\* level of theory. Both theoretical and experimental  $^1\text{H}$  NMR and  $^{13}\text{C}$  NMR spectral data are presented in table.  $^1\text{H}$  NMR revealed the presence of 6 resonances of 18 protons out of which 9 correspond to aromatic protons lies between 7.34-8.20 ppm and rest 9 corresponds to tertiary butyl group give sharp singlet at 1.52ppm. However, its theoretical  $^1\text{H}$  NMR spectra displayed all the 18 resonances for 18 protons in similar region which revealed a good agreement. Similarly,  $^{13}\text{C}$  NMR revealed the presence of 14 resonance of 19 carbons experimentally in which 11 resonance corresponds to 14 aromatic carbons lies in range of 114-138 ppm and 1 resonance for carbonyl carbon at approx. 142 ppm. 1 resonance for 3 methyl carbons and 1 quaternary carbon of tertiary butyl group lies at 30ppm and 55ppm respectively. However, DFT calculation for  $^{13}\text{C}$  NMR spectra gives 19 resonance for each 19 carbon atoms which is again in good agreement with experimental results.

**Table S1: Comparison of theoretical and experimental NMR data**

| $^1\text{H}$ NMR                |             | $^{13}\text{C}$ NMR             |             |
|---------------------------------|-------------|---------------------------------|-------------|
| Experimental<br>( $\delta$ ppm) | Theoretical | Experimental<br>( $\delta$ ppm) | Theoretical |

|                   |              |       |       |
|-------------------|--------------|-------|-------|
| 8.20-8.14 (m, 2H) | 9.11 (s, 1H) | 141.8 | 132.5 |
| 8.04-8.02 (m, 2H) | 8.81 (s, 1H) | 138.6 | 127.8 |
| 7.66 (t, 1H)      | 8.69 (s, 1H) | 133.2 | 123.6 |
| 7.50-7.41 (m, 3H) | 8.62 (s, 1H) | 132.3 | 120.6 |
| 7.34 (t, 1H)      | 8.34 (s, 1H) | 129.3 | 119.7 |
| 1.52 (s, 9H)      | 8.08 (s, 1H) | 128.9 | 119.4 |
|                   | 8.08 (s, 1H) | 128.2 | 116.8 |
|                   | 8.05 (s, 1H) | 127.9 | 115.5 |
|                   | 7.90 (s, 1H) | 127.8 | 115.3 |
|                   | 2.20 (s, 1H) | 125.3 | 113.2 |
|                   | 2.00 (s, 1H) | 115.3 | 113.1 |
|                   | 1.99 (s, 1H) | 114.9 | 111.7 |
|                   | 1.93 (s, 1H) | 55.0  | 111.0 |
|                   | 1.82 (s, 1H) | 30.0  | 102.9 |
|                   | 1.73 (s, 1H) |       | 101.9 |
|                   | 1.47 (s, 1H) |       | 49.6  |
|                   | 1.45 (s, 1H) |       | 26.8  |
|                   | 1.05 (s, 1H) |       | 18.5  |
|                   |              |       | 13.9  |

## Optimized Cartesian Coordinates and electronic energies

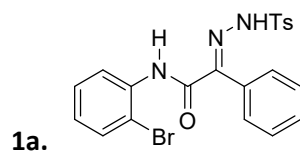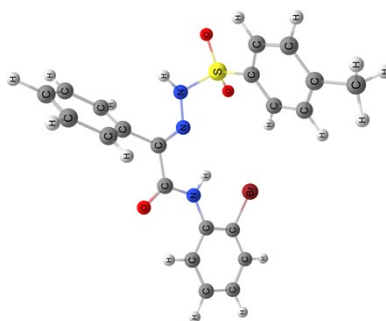

|                                              |                             |
|----------------------------------------------|-----------------------------|
| Zero-point correction=                       | 0.354593 (Hartree/Particle) |
| Thermal correction to Energy=                | 0.381260                    |
| Thermal correction to Enthalpy=              | 0.382204                    |
| Thermal correction to Gibbs free energy=     | 0.291742                    |
| Sum of electronic and zero-point Energies=   | -1612.183338                |
| Sum of electronic and thermal Energies=      | -1612.156671                |
| Sum of electronic and thermal Enthalpies=    | -1612.155727                |
| Sum of electronic and thermal Free Energies= | -1612.246189                |

|    |              |              |              |
|----|--------------|--------------|--------------|
| C  | -5.759998000 | 0.824374000  | 1.004378000  |
| C  | -5.164263000 | -0.107712000 | 0.151255000  |
| C  | -3.812215000 | 0.004988000  | -0.151631000 |
| C  | -3.008834000 | 1.036910000  | 0.373106000  |
| C  | -3.629447000 | 1.967042000  | 1.231176000  |
| C  | -4.984966000 | 1.855974000  | 1.537110000  |
| H  | -6.815738000 | 0.739857000  | 1.242268000  |
| H  | -5.744276000 | -0.916713000 | -0.278544000 |
| H  | -3.030196000 | 2.767783000  | 1.641124000  |
| H  | -5.434604000 | 2.589309000  | 2.199900000  |
| Br | -3.037295000 | -1.324004000 | -1.364585000 |
| N  | -1.651028000 | 1.098281000  | 0.032713000  |
| H  | -1.300242000 | 0.370826000  | -0.583224000 |
| C  | -0.707584000 | 2.011316000  | 0.430252000  |
| O  | -0.916632000 | 2.971947000  | 1.166491000  |
| C  | 0.680593000  | 1.745786000  | -0.120763000 |
| C  | 1.749000000  | 2.755676000  | 0.111463000  |
| C  | 2.052963000  | 3.201151000  | 1.409284000  |
| C  | 2.469369000  | 3.278550000  | -0.978016000 |
| C  | 3.067605000  | 4.137907000  | 1.610774000  |
| H  | 1.486611000  | 2.822236000  | 2.252324000  |
| C  | 3.476741000  | 4.223713000  | -0.771972000 |
| H  | 2.227216000  | 2.960016000  | -1.988080000 |
| C  | 3.780598000  | 4.651905000  | 0.523121000  |
| H  | 3.295132000  | 4.473689000  | 2.618305000  |

|   |              |              |              |
|---|--------------|--------------|--------------|
| H | 4.018741000  | 4.625894000  | -1.622816000 |
| H | 4.565074000  | 5.385833000  | 0.683731000  |
| N | 0.825312000  | 0.633369000  | -0.761699000 |
| N | 2.018579000  | 0.283919000  | -1.287791000 |
| H | 2.871076000  | 0.731711000  | -0.941313000 |
| S | 2.232859000  | -1.376127000 | -1.696754000 |
| O | 3.630505000  | -1.404229000 | -2.135657000 |
| O | 1.117438000  | -1.740055000 | -2.563715000 |
| C | 2.083519000  | -2.289481000 | -0.163968000 |
| C | 0.825285000  | -2.735568000 | 0.249911000  |
| C | 3.227930000  | -2.534642000 | 0.599550000  |
| C | 0.720713000  | -3.431754000 | 1.453622000  |
| H | -0.048987000 | -2.549477000 | -0.364017000 |
| C | 3.100788000  | -3.235086000 | 1.799243000  |
| H | 4.197941000  | -2.197058000 | 0.249835000  |
| C | 1.850916000  | -3.694075000 | 2.244893000  |
| H | -0.255622000 | -3.780131000 | 1.780153000  |
| H | 3.988238000  | -3.433378000 | 2.394473000  |
| C | 1.727225000  | -4.480518000 | 3.527981000  |
| H | 1.759978000  | -5.558716000 | 3.326739000  |
| H | 2.543251000  | -4.250518000 | 4.219172000  |
| H | 0.779840000  | -4.272009000 | 4.034372000  |

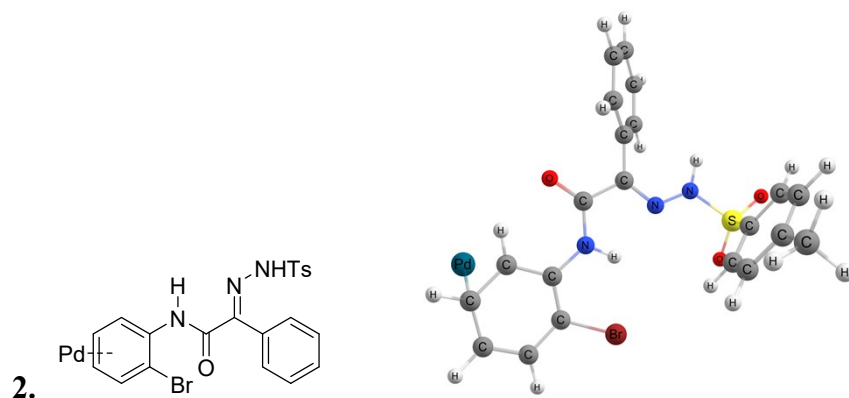

|                                              |              |                             |              |
|----------------------------------------------|--------------|-----------------------------|--------------|
| Zero-point correction=                       |              | 0.354601 (Hartree/Particle) |              |
| Thermal correction to Energy=                |              | 0.383211                    |              |
| Thermal correction to Enthalpy=              |              | 0.384155                    |              |
| Thermal correction to Gibbs free energy=     |              | 0.288851                    |              |
| Sum of electronic and zero-point Energies=   |              | -1740.122683                |              |
| Sum of electronic and thermal Energies=      |              | -1740.094073                |              |
| Sum of electronic and thermal Enthalpies=    |              | -1740.093128                |              |
| Sum of electronic and thermal Free Energies= |              | -1740.188433                |              |
| C                                            | -4.659641000 | -1.962602000                | 0.952835000  |
| C                                            | -3.752244000 | -2.509619000                | 0.058439000  |
| C                                            | -2.568689000 | -1.820433000                | -0.246457000 |
| C                                            | -2.249562000 | -0.580725000                | 0.314804000  |
| C                                            | -3.181474000 | -0.008640000                | 1.245768000  |
| C                                            | -4.383944000 | -0.712547000                | 1.570818000  |

|    |              |              |              |
|----|--------------|--------------|--------------|
| H  | -5.563079000 | -2.507827000 | 1.208872000  |
| H  | -3.949324000 | -3.467387000 | -0.410090000 |
| H  | -2.830577000 | 0.802727000  | 1.870636000  |
| H  | -4.941786000 | -0.426534000 | 2.460125000  |
| Br | -1.340727000 | -2.669428000 | -1.521136000 |
| N  | -1.032436000 | 0.038077000  | 0.005311000  |
| H  | -0.400276000 | -0.478773000 | -0.599644000 |
| C  | -0.583906000 | 1.284464000  | 0.355337000  |
| O  | -1.196601000 | 2.088702000  | 1.055986000  |
| C  | 0.781967000  | 1.629215000  | -0.206157000 |
| C  | 1.308102000  | 3.009141000  | -0.016222000 |
| C  | 1.446026000  | 3.557536000  | 1.270211000  |
| C  | 1.681726000  | 3.777769000  | -1.133210000 |
| C  | 1.958547000  | 4.845335000  | 1.433531000  |
| H  | 1.148558000  | 2.978191000  | 2.137437000  |
| C  | 2.184056000  | 5.070144000  | -0.964805000 |
| H  | 1.562187000  | 3.371789000  | -2.134004000 |
| C  | 2.326439000  | 5.604906000  | 0.318408000  |
| H  | 2.063125000  | 5.258462000  | 2.432744000  |
| H  | 2.459958000  | 5.656973000  | -1.836244000 |
| H  | 2.718559000  | 6.609620000  | 0.448918000  |
| N  | 1.394231000  | 0.673240000  | -0.821641000 |
| N  | 2.617139000  | 0.873847000  | -1.366483000 |
| H  | 3.179676000  | 1.664643000  | -1.038820000 |
| S  | 3.551826000  | -0.536852000 | -1.679208000 |
| O  | 4.802084000  | 0.026090000  | -2.201749000 |
| O  | 2.708540000  | -1.430850000 | -2.469933000 |
| C  | 3.863791000  | -1.292795000 | -0.087767000 |
| C  | 2.967416000  | -2.243935000 | 0.407925000  |
| C  | 4.987544000  | -0.902681000 | 0.646248000  |
| C  | 3.206838000  | -2.805707000 | 1.661288000  |
| H  | 2.107906000  | -2.545362000 | -0.180080000 |
| C  | 5.208694000  | -1.478633000 | 1.896935000  |
| H  | 5.682426000  | -0.173969000 | 0.242177000  |
| C  | 4.326594000  | -2.435784000 | 2.424355000  |
| H  | 2.513070000  | -3.546491000 | 2.050145000  |
| H  | 6.084492000  | -1.183347000 | 2.468627000  |
| C  | 4.591111000  | -3.076909000 | 3.763575000  |
| H  | 5.122483000  | -4.029232000 | 3.638290000  |
| H  | 5.209816000  | -2.437006000 | 4.399787000  |
| H  | 3.658917000  | -3.292378000 | 4.295313000  |
| Pd | -4.866326000 | 0.902453000  | 0.192674000  |

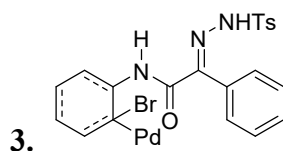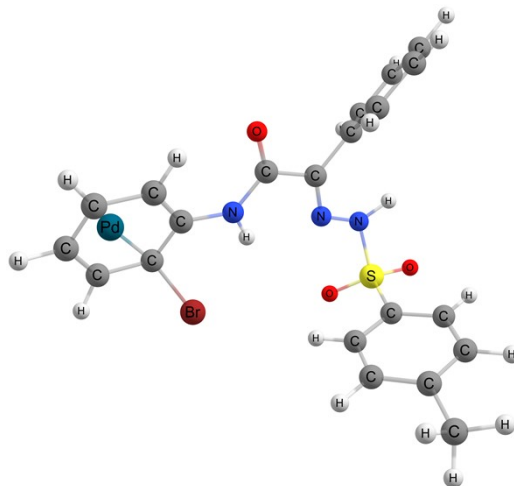

|                                              |                             |
|----------------------------------------------|-----------------------------|
| Zero-point correction=                       | 0.353983 (Hartree/Particle) |
| Thermal correction to Energy=                | 0.382858                    |
| Thermal correction to Enthalpy=              | 0.383802                    |
| Thermal correction to Gibbs Free Energy=     | 0.287324                    |
| Sum of electronic and zero-point Energies=   | -1740.122007                |
| Sum of electronic and thermal Energies=      | -1740.093132                |
| Sum of electronic and thermal Enthalpies=    | -1740.092188                |
| Sum of electronic and thermal Free Energies= | -1740.188665                |

|    |              |              |              |
|----|--------------|--------------|--------------|
| C  | -4.808698000 | -0.211605000 | 2.079448000  |
| C  | -4.347571000 | -0.876114000 | 0.911429000  |
| C  | -3.075087000 | -0.517516000 | 0.360050000  |
| C  | -2.251108000 | 0.473049000  | 1.012054000  |
| C  | -2.756124000 | 1.096164000  | 2.155666000  |
| C  | -4.016007000 | 0.750827000  | 2.681677000  |
| H  | -5.763644000 | -0.500256000 | 2.508677000  |
| H  | -4.825091000 | -1.800636000 | 0.600786000  |
| H  | -2.156614000 | 1.857432000  | 2.634601000  |
| H  | -4.356417000 | 1.250545000  | 3.583861000  |
| Br | -2.123182000 | -1.943719000 | -0.724421000 |
| N  | -0.979332000 | 0.739195000  | 0.485877000  |
| H  | -0.643502000 | 0.111167000  | -0.238834000 |
| C  | -0.124398000 | 1.760681000  | 0.802311000  |
| O  | -0.355193000 | 2.644794000  | 1.626724000  |
| C  | 1.182698000  | 1.743172000  | 0.035363000  |
| C  | 2.108355000  | 2.901838000  | 0.174017000  |
| C  | 2.598953000  | 3.286652000  | 1.433243000  |
| C  | 2.509251000  | 3.619628000  | -0.967039000 |
| C  | 3.481662000  | 4.362019000  | 1.544348000  |
| H  | 2.285670000  | 2.747847000  | 2.320793000  |
| C  | 3.384200000  | 4.702014000  | -0.849080000 |
| H  | 2.123277000  | 3.341800000  | -1.944044000 |
| C  | 3.874400000  | 5.072952000  | 0.405907000  |
| H  | 3.856669000  | 4.649590000  | 2.522470000  |
| H  | 3.678712000  | 5.254154000  | -1.736947000 |

|    |              |              |               |
|----|--------------|--------------|---------------|
| H  | 4.556388000  | 5.913684000  | 0.497096000   |
| N  | 1.395416000  | 0.701323000  | -0.697434000  |
| N  | 2.532919000  | 0.594947000  | -1.424896000  |
| H  | 3.339288000  | 1.171473000  | -1.167433000  |
| S  | 2.973144000  | -0.987981000 | -1.933951000  |
| O  | 4.246568000  | -0.750710000 | -2.623936000  |
| O  | 1.808361000  | -1.546611000 | -2.617385000  |
| C  | 3.277148000  | -1.929694000 | -0.443472000  |
| C  | 2.217842000  | -2.608377000 | 0.167009000   |
| C  | 4.564416000  | -1.955641000 | 0.099214000   |
| C  | 2.461113000  | -3.318928000 | 1.340721000   |
| H  | 1.227508000  | -2.587690000 | -0.273501000  |
| C  | 4.786109000  | -2.675104000 | 1.273944000   |
| H  | 5.378995000  | -1.435776000 | -0.393957000  |
| C  | 3.743919000  | -3.365587000 | 1.912434000   |
| H  | 1.640844000  | -3.848680000 | 1.818135000   |
| H  | 5.787004000  | -2.704193000 | 1.696192000   |
| C  | 3.993534000  | -4.162603000 | 3.168173000   |
| H  | 4.024998000  | -5.236989000 | 2.946483000   |
| H  | 4.945894000  | -3.892333000 | 3.633166000   |
| H  | 3.196676000  | -4.007664000 | 3.903327000   |
| Pd | -4.448351000 | 0.383465000  | -0.913597000. |

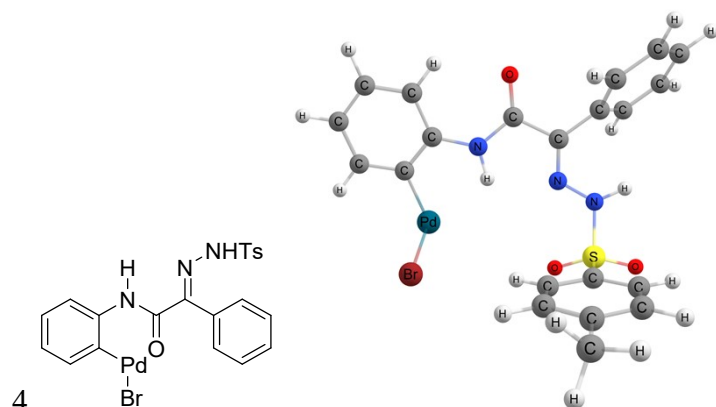

|                                              |                             |
|----------------------------------------------|-----------------------------|
| Zero-point correction=                       | 0.354415 (Hartree/Particle) |
| Thermal correction to Energy=                | 0.383379                    |
| Thermal correction to Enthalpy=              | 0.384323                    |
| Thermal correction to Gibbs Free Energy=     | 0.288546                    |
| Sum of electronic and zero-point Energies=   | -1740.154753                |
| Sum of electronic and thermal Energies=      | -1740.125790                |
| Sum of electronic and thermal Enthalpies=    | -1740.124846                |
| Sum of electronic and thermal Free Energies= | -1740.220622                |

|   |              |             |             |
|---|--------------|-------------|-------------|
| C | -4.889902000 | 2.522997000 | 1.306117000 |
| C | -4.571314000 | 1.428548000 | 0.492589000 |
| C | -3.242661000 | 1.190085000 | 0.145568000 |

|    |              |              |              |
|----|--------------|--------------|--------------|
| C  | -2.186018000 | 1.970286000  | 0.668966000  |
| C  | -2.525891000 | 3.059588000  | 1.493549000  |
| C  | -3.861707000 | 3.327519000  | 1.798455000  |
| H  | -5.926511000 | 2.723027000  | 1.560526000  |
| H  | -5.357120000 | 0.770677000  | 0.133998000  |
| H  | -1.734234000 | 3.683466000  | 1.884835000  |
| H  | -4.092482000 | 4.171250000  | 2.442524000  |
| Br | -2.979297000 | -2.053095000 | 0.229517000  |
| N  | -0.859698000 | 1.643497000  | 0.334063000  |
| H  | -0.723742000 | 0.783332000  | -0.190503000 |
| C  | 0.279619000  | 2.375667000  | 0.537365000  |
| O  | 0.334639000  | 3.439984000  | 1.151432000  |
| C  | 1.525523000  | 1.786424000  | -0.095561000 |
| C  | 2.812703000  | 2.520187000  | 0.057237000  |
| C  | 3.329705000  | 2.796327000  | 1.334178000  |
| C  | 3.527485000  | 2.941627000  | -1.077983000 |
| C  | 4.544610000  | 3.469105000  | 1.470122000  |
| H  | 2.779519000  | 2.487805000  | 2.217016000  |
| C  | 4.738017000  | 3.624233000  | -0.936614000 |
| H  | 3.128317000  | 2.751876000  | -2.070655000 |
| C  | 5.250320000  | 3.885834000  | 0.336822000  |
| H  | 4.936162000  | 3.675022000  | 2.462190000  |
| H  | 5.276191000  | 3.952558000  | -1.821183000 |
| H  | 6.192504000  | 4.415394000  | 0.446438000  |
| N  | 1.360245000  | 0.689123000  | -0.756415000 |
| N  | 2.399054000  | 0.111791000  | -1.403321000 |
| H  | 3.353357000  | 0.365814000  | -1.132520000 |
| S  | 2.233850000  | -1.553677000 | -1.806524000 |
| O  | 3.488866000  | -1.828056000 | -2.515139000 |
| O  | 0.928895000  | -1.693880000 | -2.451461000 |
| C  | 2.227646000  | -2.445004000 | -0.256708000 |
| C  | 1.013858000  | -2.685608000 | 0.394651000  |
| C  | 3.443794000  | -2.858311000 | 0.294585000  |
| C  | 1.030582000  | -3.348969000 | 1.620028000  |
| H  | 0.073909000  | -2.374935000 | -0.048028000 |
| C  | 3.435641000  | -3.522585000 | 1.521356000  |
| H  | 4.376040000  | -2.677857000 | -0.230250000 |
| C  | 2.235137000  | -3.777564000 | 2.202951000  |
| H  | 0.089110000  | -3.539150000 | 2.128545000  |
| H  | 4.377565000  | -3.852513000 | 1.951179000  |
| C  | 2.227722000  | -4.512906000 | 3.519679000  |
| H  | 1.612312000  | -3.992134000 | 4.261572000  |
| H  | 1.806988000  | -5.519227000 | 3.401051000  |
| H  | 3.237250000  | -4.619291000 | 3.926748000  |
| Pd | -2.940369000 | -0.118002000 | -1.263376000 |



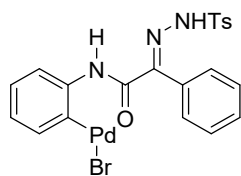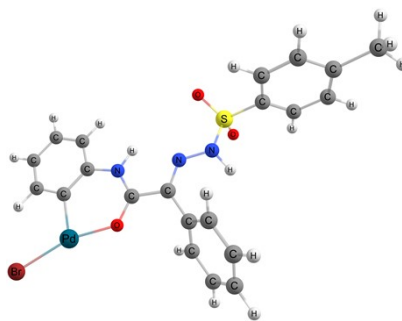

|                                              |                             |
|----------------------------------------------|-----------------------------|
| Zero-point correction=                       | 0.355779 (Hartree/Particle) |
| Thermal correction to Energy=                | 0.384388                    |
| Thermal correction to Enthalpy=              | 0.385332                    |
| Thermal correction to Gibbs Free Energy=     | 0.289218                    |
| Sum of electronic and zero-point Energies=   | -1740.184626                |
| Sum of electronic and thermal Energies=      | -1740.156018                |
| Sum of electronic and thermal Enthalpies=    | -1740.155074                |
| Sum of electronic and thermal Free Energies= | -1740.251188                |

|    |              |              |              |
|----|--------------|--------------|--------------|
| C  | -4.425431000 | -3.691753000 | -0.058058000 |
| C  | -4.592506000 | -2.306266000 | -0.110759000 |
| C  | -3.491410000 | -1.434857000 | -0.070448000 |
| C  | -2.202138000 | -1.998131000 | 0.026753000  |
| C  | -2.042501000 | -3.397394000 | 0.080548000  |
| C  | -3.144286000 | -4.241073000 | 0.037908000  |
| H  | -5.300898000 | -4.333953000 | -0.091995000 |
| H  | -5.590435000 | -1.897515000 | -0.184462000 |
| H  | -1.039213000 | -3.810625000 | 0.158301000  |
| H  | -3.001848000 | -5.316639000 | 0.080422000  |
| Br | -6.209446000 | 0.787638000  | -0.333826000 |
| N  | -0.998869000 | -1.261574000 | 0.081806000  |
| H  | -0.137186000 | -1.799616000 | 0.139457000  |
| C  | -0.813724000 | 0.061204000  | 0.059074000  |
| O  | -1.745648000 | 0.902026000  | -0.017937000 |
| C  | 0.601601000  | 0.552095000  | 0.128181000  |
| C  | 0.872916000  | 2.013881000  | 0.188122000  |
| C  | 0.311716000  | 2.802904000  | 1.206785000  |
| C  | 1.709375000  | 2.617426000  | -0.767631000 |
| C  | 0.591061000  | 4.168330000  | 1.271366000  |
| H  | -0.340760000 | 2.349235000  | 1.945903000  |
| C  | 1.977355000  | 3.986651000  | -0.704077000 |
| H  | 2.130990000  | 2.021067000  | -1.572081000 |
| C  | 1.421832000  | 4.763058000  | 0.316527000  |
| H  | 0.154170000  | 4.768352000  | 2.064189000  |
| H  | 2.614404000  | 4.445269000  | -1.454765000 |
| H  | 1.630963000  | 5.827884000  | 0.365218000  |
| N  | 1.487913000  | -0.387948000 | 0.128297000  |
| N  | 2.806127000  | -0.102218000 | 0.166765000  |
| H  | 3.074764000  | 0.815326000  | 0.540696000  |

|    |              |              |              |
|----|--------------|--------------|--------------|
| S  | 3.790792000  | -1.399119000 | 0.799618000  |
| O  | 3.313311000  | -2.615376000 | 0.140426000  |
| O  | 3.821811000  | -1.308102000 | 2.265827000  |
| C  | 5.374403000  | -0.901428000 | 0.148353000  |
| C  | 6.312160000  | -0.316277000 | 1.000683000  |
| C  | 5.655902000  | -1.124523000 | -1.205038000 |
| C  | 7.553348000  | 0.056225000  | 0.480210000  |
| H  | 6.080670000  | -0.165261000 | 2.049590000  |
| C  | 6.898779000  | -0.745121000 | -1.701948000 |
| H  | 4.920685000  | -1.591177000 | -1.852270000 |
| C  | 7.866747000  | -0.150678000 | -0.870920000 |
| H  | 8.288474000  | 0.509330000  | 1.139385000  |
| H  | 7.125843000  | -0.917388000 | -2.750781000 |
| C  | 9.215603000  | 0.230139000  | -1.426250000 |
| H  | 9.809039000  | -0.664924000 | -1.650831000 |
| H  | 9.115370000  | 0.792809000  | -2.360876000 |
| H  | 9.785274000  | 0.839582000  | -0.719285000 |
| Pd | -3.754982000 | 0.515525000  | -0.149493000 |

6.

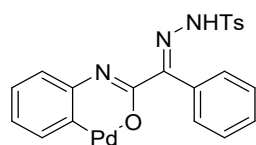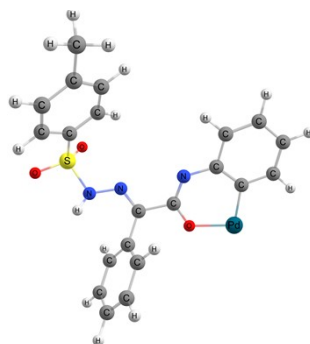

|                                              |                             |
|----------------------------------------------|-----------------------------|
| Zero-point correction=                       | 0.340563 (Hartree/Particle) |
| Thermal correction to Energy=                | 0.366837                    |
| Thermal correction to Enthalpy=              | 0.367781                    |
| Thermal correction to Gibbs Free Energy=     | 0.278458                    |
| Sum of electronic and zero-point Energies=   | -1726.116248                |
| Sum of electronic and thermal Energies=      | -1726.089974                |
| Sum of electronic and thermal Enthalpies=    | -1726.089030                |
| Sum of electronic and thermal Free Energies= | -1726.178353                |

|   |              |              |              |
|---|--------------|--------------|--------------|
| C | -4.140182000 | -3.805242000 | 0.130319000  |
| C | -4.479080000 | -2.460090000 | -0.055965000 |
| C | -3.468441000 | -1.501120000 | -0.100100000 |
| C | -2.102116000 | -1.809255000 | 0.031521000  |
| C | -1.797296000 | -3.180340000 | 0.219891000  |
| C | -2.790095000 | -4.153742000 | 0.267316000  |
| H | -4.919197000 | -4.561065000 | 0.166200000  |
| H | -5.526229000 | -2.174316000 | -0.164081000 |

|    |              |              |              |
|----|--------------|--------------|--------------|
| H  | -0.749003000 | -3.444646000 | 0.323964000  |
| H  | -2.513247000 | -5.194516000 | 0.410897000  |
| N  | -1.029356000 | -0.924670000 | 0.005556000  |
| C  | -1.181489000 | 0.350608000  | -0.174443000 |
| O  | -2.273993000 | 1.060207000  | -0.336644000 |
| C  | 0.050838000  | 1.223212000  | -0.206039000 |
| C  | 0.018028000  | 2.514155000  | 0.543653000  |
| C  | -0.347789000 | 2.521211000  | 1.900688000  |
| C  | 0.337399000  | 3.730868000  | -0.083345000 |
| C  | -0.380276000 | 3.717586000  | 2.618516000  |
| H  | -0.602280000 | 1.586419000  | 2.393106000  |
| C  | 0.293048000  | 4.928119000  | 0.635261000  |
| H  | 0.603808000  | 3.742106000  | -1.136139000 |
| C  | -0.061317000 | 4.924376000  | 1.987322000  |
| H  | -0.657025000 | 3.708144000  | 3.669098000  |
| H  | 0.533577000  | 5.862673000  | 0.136241000  |
| H  | -0.090765000 | 5.855945000  | 2.545630000  |
| N  | 1.035569000  | 0.777641000  | -0.905801000 |
| N  | 2.183982000  | 1.515345000  | -0.990593000 |
| H  | 2.419316000  | 2.151896000  | -0.223599000 |
| S  | 3.555929000  | 0.673777000  | -1.574812000 |
| O  | 4.630707000  | 1.663842000  | -1.414602000 |
| O  | 3.197902000  | 0.134677000  | -2.886783000 |
| C  | 3.850107000  | -0.691994000 | -0.455312000 |
| C  | 3.132772000  | -1.881711000 | -0.619400000 |
| C  | 4.784395000  | -0.543988000 | 0.572001000  |
| C  | 3.364962000  | -2.932430000 | 0.265129000  |
| H  | 2.408075000  | -1.979715000 | -1.419581000 |
| C  | 5.003130000  | -1.611156000 | 1.444951000  |
| H  | 5.339460000  | 0.382112000  | 0.677113000  |
| C  | 4.300950000  | -2.817817000 | 1.307262000  |
| H  | 2.810065000  | -3.859148000 | 0.142663000  |
| H  | 5.735696000  | -1.503692000 | 2.240579000  |
| C  | 4.549536000  | -3.976128000 | 2.241418000  |
| H  | 5.035841000  | -4.806631000 | 1.714644000  |
| H  | 5.194122000  | -3.687760000 | 3.076663000  |
| H  | 3.610171000  | -4.361544000 | 2.653761000  |
| Pd | -4.106914000 | 0.299665000  | -0.358564000 |

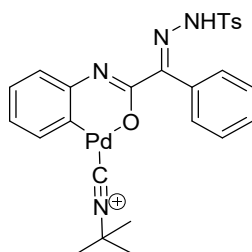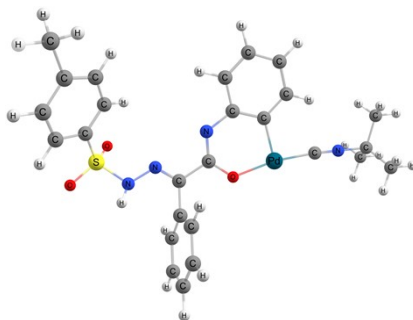

|                                              |                             |
|----------------------------------------------|-----------------------------|
| Zero-point correction=                       | 0.473328 (Hartree/Particle) |
| Thermal correction to Energy=                | 0.508074                    |
| Thermal correction to Enthalpy=              | 0.509018                    |
| Thermal correction to Gibbs Free Energy=     | 0.400098                    |
| Sum of electronic and zero-point Energies=   | -1976.736664                |
| Sum of electronic and thermal Energies=      | -1976.701918                |
| Sum of electronic and thermal Enthalpies=    | -1976.700974                |
| Sum of electronic and thermal Free Energies= | -1976.809894                |

|   |              |              |              |
|---|--------------|--------------|--------------|
| C | -2.786032000 | -3.827591000 | 0.247987000  |
| C | -3.184632000 | -2.493953000 | 0.137686000  |
| C | -2.242699000 | -1.458724000 | 0.045292000  |
| C | -0.848841000 | -1.746631000 | 0.062572000  |
| C | -0.486981000 | -3.116493000 | 0.175666000  |
| C | -1.422117000 | -4.136504000 | 0.265868000  |
| H | -3.537708000 | -4.609151000 | 0.317521000  |
| H | -4.244292000 | -2.272468000 | 0.125465000  |
| H | 0.577144000  | -3.332095000 | 0.186431000  |
| H | -1.091614000 | -5.168385000 | 0.348678000  |
| N | 0.240519000  | -0.886384000 | -0.009705000 |
| C | 0.123648000  | 0.401917000  | -0.108518000 |
| O | -0.965002000 | 1.118911000  | -0.133622000 |
| C | 1.377637000  | 1.234834000  | -0.195149000 |
| C | 1.403887000  | 2.540552000  | 0.531075000  |
| C | 1.116699000  | 2.579147000  | 1.906092000  |
| C | 1.705437000  | 3.739864000  | -0.136464000 |
| C | 1.143187000  | 3.789182000  | 2.601118000  |
| H | 0.874484000  | 1.658130000  | 2.429477000  |
| C | 1.719872000  | 4.951295000  | 0.559432000  |
| H | 1.913910000  | 3.725993000  | -1.202282000 |
| C | 1.443216000  | 4.978774000  | 1.929256000  |
| H | 0.926146000  | 3.803858000  | 3.665647000  |
| H | 1.946282000  | 5.872242000  | 0.029319000  |
| H | 1.459261000  | 5.921080000  | 2.469931000  |
| N | 2.334102000  | 0.758330000  | -0.914737000 |
| N | 3.494256000  | 1.475300000  | -1.038415000 |
| H | 3.760893000  | 2.114317000  | -0.284051000 |
| S | 4.835133000  | 0.599693000  | -1.638875000 |
| O | 5.937358000  | 1.563009000  | -1.498596000 |
| O | 4.447189000  | 0.064599000  | -2.944205000 |
| C | 5.111814000  | -0.770155000 | -0.519210000 |
| C | 4.355783000  | -1.938474000 | -0.663321000 |
| C | 6.071228000  | -0.646744000 | 0.487714000  |
| C | 4.574414000  | -2.992183000 | 0.220927000  |
| H | 3.612035000  | -2.017622000 | -1.447928000 |
| C | 6.275991000  | -1.716925000 | 1.360734000  |
| H | 6.656616000  | 0.262228000  | 0.576535000  |
| C | 5.534120000  | -2.901618000 | 1.243792000  |
| H | 3.989672000  | -3.902361000 | 0.113909000  |

|    |              |              |              |
|----|--------------|--------------|--------------|
| H  | 7.028955000  | -1.629194000 | 2.139576000  |
| C  | 5.753964000  | -4.057920000 | 2.187782000  |
| H  | 6.033723000  | -4.966206000 | 1.640955000  |
| H  | 6.546016000  | -3.842102000 | 2.910516000  |
| H  | 4.839392000  | -4.287685000 | 2.747676000  |
| Pd | -2.828486000 | 0.439077000  | -0.114921000 |
| C  | -4.758245000 | 0.116272000  | -0.137051000 |
| N  | -5.921744000 | 0.030206000  | -0.163885000 |
| C  | -7.369660000 | -0.084982000 | -0.200867000 |
| C  | -7.926033000 | 0.644296000  | 1.034296000  |
| H  | -7.646624000 | 1.702129000  | 1.022795000  |
| H  | -9.017921000 | 0.574928000  | 1.032457000  |
| H  | -7.550916000 | 0.192673000  | 1.957470000  |
| C  | -7.855489000 | 0.571497000  | -1.504772000 |
| H  | -7.430970000 | 0.067858000  | -2.378278000 |
| H  | -8.945963000 | 0.500559000  | -1.558737000 |
| H  | -7.575192000 | 1.628565000  | -1.538973000 |
| C  | -7.717162000 | -1.583304000 | -0.167992000 |
| H  | -8.804476000 | -1.700118000 | -0.200199000 |
| H  | -7.288119000 | -2.104272000 | -1.029119000 |
| H  | -7.346821000 | -2.052392000 | 0.748498000  |

8.

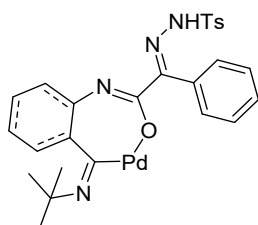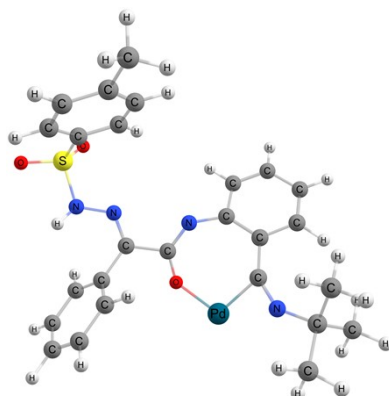

|                                              |                             |
|----------------------------------------------|-----------------------------|
| Zero-point correction=                       | 0.474373 (Hartree/Particle) |
| Thermal correction to Energy=                | 0.507606                    |
| Thermal correction to Enthalpy=              | 0.508550                    |
| Thermal correction to Gibbs Free Energy=     | 0.405158                    |
| Sum of electronic and zero-point Energies=   | -1976.715826                |
| Sum of electronic and thermal Energies=      | -1976.682593                |
| Sum of electronic and thermal Enthalpies=    | -1976.681648                |
| Sum of electronic and thermal Free Energies= | -1976.785040                |

|   |              |              |              |
|---|--------------|--------------|--------------|
| C | -2.954908000 | -3.654730000 | -2.146597000 |
| C | -3.410518000 | -2.670109000 | -1.287362000 |
| C | -2.602562000 | -1.560189000 | -0.933135000 |
| C | -1.260550000 | -1.453489000 | -1.435107000 |
| C | -0.836576000 | -2.485348000 | -2.313815000 |

|    |              |              |              |
|----|--------------|--------------|--------------|
| C  | -1.655614000 | -3.543973000 | -2.671985000 |
| H  | -3.596102000 | -4.487800000 | -2.417214000 |
| H  | -4.421619000 | -2.719216000 | -0.897189000 |
| H  | 0.178317000  | -2.419055000 | -2.692922000 |
| H  | -1.280557000 | -4.299981000 | -3.356855000 |
| N  | -0.269508000 | -0.570264000 | -1.065096000 |
| C  | -0.199357000 | 0.727829000  | -1.058911000 |
| O  | -1.099576000 | 1.620062000  | -1.351581000 |
| C  | 1.149869000  | 1.329389000  | -0.714615000 |
| C  | 1.176001000  | 2.649752000  | -0.013782000 |
| C  | 0.577664000  | 2.783578000  | 1.250242000  |
| C  | 1.797509000  | 3.767427000  | -0.594992000 |
| C  | 0.605240000  | 4.007505000  | 1.921494000  |
| H  | 0.092492000  | 1.925175000  | 1.707339000  |
| C  | 1.814140000  | 4.994309000  | 0.073586000  |
| H  | 2.254081000  | 3.679167000  | -1.576653000 |
| C  | 1.221237000  | 5.117007000  | 1.333339000  |
| H  | 0.144498000  | 4.095923000  | 2.901647000  |
| H  | 2.289563000  | 5.853051000  | -0.392068000 |
| H  | 1.238370000  | 6.070623000  | 1.853675000  |
| N  | 2.194633000  | 0.671486000  | -1.084210000 |
| N  | 3.432768000  | 1.188457000  | -0.827821000 |
| H  | 3.546615000  | 1.845678000  | -0.050910000 |
| S  | 4.731129000  | 0.080019000  | -0.938245000 |
| O  | 5.880825000  | 0.881771000  | -0.495269000 |
| O  | 4.676613000  | -0.511929000 | -2.274876000 |
| C  | 4.418853000  | -1.204783000 | 0.270397000  |
| C  | 3.534591000  | -2.241970000 | -0.042427000 |
| C  | 5.051250000  | -1.141793000 | 1.514549000  |
| C  | 3.287647000  | -3.226006000 | 0.913266000  |
| H  | 3.045894000  | -2.273889000 | -1.009358000 |
| C  | 4.793736000  | -2.140638000 | 2.454373000  |
| H  | 5.739729000  | -0.333592000 | 1.737209000  |
| C  | 3.912786000  | -3.195941000 | 2.170873000  |
| H  | 2.596848000  | -4.031006000 | 0.676373000  |
| H  | 5.290090000  | -2.099701000 | 3.420457000  |
| C  | 3.662351000  | -4.289334000 | 3.179728000  |
| H  | 4.301532000  | -5.158601000 | 2.977317000  |
| H  | 3.877944000  | -3.953366000 | 4.198502000  |
| H  | 2.624123000  | -4.635065000 | 3.144840000  |
| Pd | -2.852560000 | 1.368363000  | -0.277992000 |
| C  | -3.226609000 | -0.501156000 | -0.183758000 |
| N  | -4.173336000 | -0.155262000 | 0.550243000  |
| C  | -5.197521000 | -0.696262000 | 1.471175000  |
| C  | -6.468878000 | -0.980757000 | 0.651523000  |
| C  | -4.668505000 | -1.969797000 | 2.150538000  |
| C  | -5.474206000 | 0.393950000  | 2.516702000  |
| H  | -6.815462000 | -0.074305000 | 0.145500000  |
| H  | -6.293346000 | -1.750835000 | -0.105820000 |

|   |              |              |             |
|---|--------------|--------------|-------------|
| H | -7.265952000 | -1.330974000 | 1.316141000 |
| H | -3.737178000 | -1.766410000 | 2.688879000 |
| H | -5.407812000 | -2.332191000 | 2.872727000 |
| H | -4.482858000 | -2.770872000 | 1.429975000 |
| H | -6.247817000 | 0.057630000  | 3.214181000 |
| H | -4.569647000 | 0.623396000  | 3.089209000 |
| H | -5.819275000 | 1.314238000  | 2.034748000 |

9.

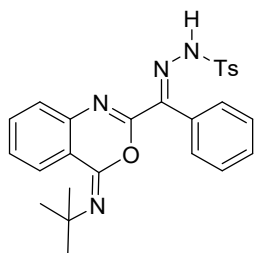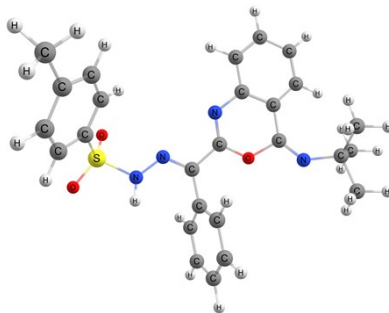

|                                              |                             |
|----------------------------------------------|-----------------------------|
| Zero-point correction=                       | 0.475408 (Hartree/Particle) |
| Thermal correction to Energy=                | 0.507032                    |
| Thermal correction to Enthalpy=              | 0.507976                    |
| Thermal correction to Gibbs Free Energy=     | 0.408224                    |
| Sum of electronic and zero-point Energies=   | -1848.814367                |
| Sum of electronic and thermal Energies=      | -1848.782743                |
| Sum of electronic and thermal Enthalpies=    | -1848.781799                |
| Sum of electronic and thermal Free Energies= | -1848.881552                |

|   |              |              |              |
|---|--------------|--------------|--------------|
| C | -3.925443000 | -3.786634000 | -1.165992000 |
| C | -4.146261000 | -2.441137000 | -0.884642000 |
| C | -3.076324000 | -1.579971000 | -0.593182000 |
| C | -1.754029000 | -2.094335000 | -0.648184000 |
| C | -1.545814000 | -3.461918000 | -0.896661000 |
| C | -2.622563000 | -4.302510000 | -1.150620000 |
| H | -4.767127000 | -4.431915000 | -1.398242000 |
| H | -5.156095000 | -2.056911000 | -0.916513000 |
| H | -0.524492000 | -3.828251000 | -0.913579000 |
| H | -2.451106000 | -5.355018000 | -1.356900000 |
| N | -0.631633000 | -1.282147000 | -0.504684000 |
| C | -0.831853000 | -0.012683000 | -0.534452000 |
| O | -2.044081000 | 0.587214000  | -0.549712000 |
| C | 0.281838000  | 0.975051000  | -0.584437000 |
| C | 0.070644000  | 2.359549000  | -0.068475000 |
| C | -0.364174000 | 2.561843000  | 1.251586000  |
| C | 0.312453000  | 3.475577000  | -0.887357000 |
| C | -0.544024000 | 3.853922000  | 1.745514000  |
| H | -0.564294000 | 1.706476000  | 1.890525000  |
| C | 0.122541000  | 4.767532000  | -0.392399000 |
| H | 0.632064000  | 3.332557000  | -1.915524000 |
| C | -0.302011000 | 4.959533000  | 0.924783000  |

|   |              |              |              |
|---|--------------|--------------|--------------|
| H | -0.879596000 | 3.996881000  | 2.768533000  |
| H | 0.303392000  | 5.621709000  | -1.038355000 |
| H | -0.448075000 | 5.965035000  | 1.308816000  |
| N | 1.383298000  | 0.527115000  | -1.091795000 |
| N | 2.460812000  | 1.338492000  | -1.170813000 |
| H | 2.534050000  | 2.155038000  | -0.556784000 |
| S | 3.969188000  | 0.570119000  | -1.463506000 |
| O | 4.911990000  | 1.694103000  | -1.398083000 |
| O | 3.805741000  | -0.235111000 | -2.672250000 |
| C | 4.259024000  | -0.521412000 | -0.075708000 |
| C | 3.671956000  | -1.790401000 | -0.066912000 |
| C | 5.052921000  | -0.080509000 | 0.985609000  |
| C | 3.891284000  | -2.622889000 | 1.028496000  |
| H | 3.054690000  | -2.116179000 | -0.896297000 |
| C | 5.262797000  | -0.933011000 | 2.069546000  |
| H | 5.506773000  | 0.904218000  | 0.957758000  |
| C | 4.689666000  | -2.213361000 | 2.109367000  |
| H | 3.434822000  | -3.609005000 | 1.042175000  |
| H | 5.886000000  | -0.597662000 | 2.894197000  |
| C | 4.945094000  | -3.141619000 | 3.270273000  |
| H | 5.733667000  | -3.863890000 | 3.023107000  |
| H | 5.268417000  | -2.592775000 | 4.159552000  |
| H | 4.048889000  | -3.715243000 | 3.527883000  |
| C | -3.229652000 | -0.154342000 | -0.230430000 |
| N | -4.107264000 | 0.588274000  | 0.277222000  |
| C | -5.446462000 | 0.366615000  | 0.838126000  |
| C | -6.491745000 | 0.339295000  | -0.295661000 |
| C | -5.541312000 | -0.877244000 | 1.744404000  |
| C | -5.720076000 | 1.612645000  | 1.709580000  |
| H | -6.405427000 | 1.240019000  | -0.911959000 |
| H | -6.380785000 | -0.526884000 | -0.953016000 |
| H | -7.501235000 | 0.311604000  | 0.128869000  |
| H | -4.763375000 | -0.845005000 | 2.515191000  |
| H | -6.512670000 | -0.886943000 | 2.250766000  |
| H | -5.441354000 | -1.819543000 | 1.204397000  |
| H | -6.720788000 | 1.566358000  | 2.153258000  |
| H | -4.985877000 | 1.683208000  | 2.519091000  |
| H | -5.644017000 | 2.522893000  | 1.106953000  |

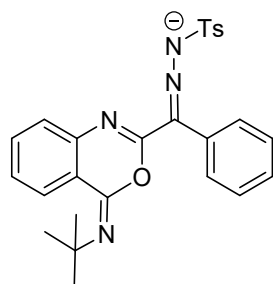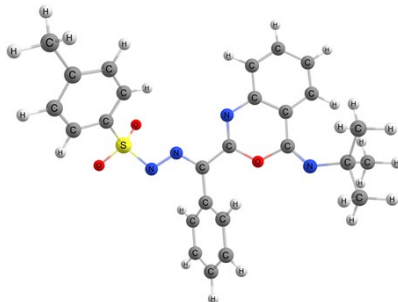

Zero-point correction=  
Thermal correction to Energy=

0.461859 (Hartree/Particle)  
0.493033



|                                              |              |
|----------------------------------------------|--------------|
| Thermal correction to Enthalpy=              | 0.493977     |
| Thermal correction to Gibbs Free Energy=     | 0.396334     |
| Sum of electronic and zero-point Energies=   | -1848.331844 |
| Sum of electronic and thermal Energies=      | -1848.300671 |
| Sum of electronic and thermal Enthalpies=    | -1848.299726 |
| Sum of electronic and thermal Free Energies= | -1848.397369 |

|   |              |              |              |
|---|--------------|--------------|--------------|
| C | -3.831014000 | -3.709741000 | -1.485674000 |
| C | -4.078527000 | -2.408949000 | -1.059076000 |
| C | -3.026895000 | -1.554139000 | -0.688600000 |
| C | -1.684180000 | -2.009556000 | -0.817349000 |
| C | -1.452665000 | -3.347072000 | -1.210995000 |
| C | -2.509413000 | -4.183733000 | -1.537742000 |
| H | -4.657634000 | -4.350956000 | -1.777179000 |
| H | -5.097789000 | -2.047331000 | -1.037067000 |
| H | -0.422552000 | -3.681915000 | -1.282390000 |
| H | -2.310892000 | -5.203588000 | -1.857140000 |
| N | -0.594633000 | -1.197241000 | -0.593640000 |
| C | -0.810719000 | 0.085257000  | -0.520954000 |
| O | -2.072049000 | 0.622220000  | -0.483214000 |
| C | 0.239438000  | 1.095416000  | -0.515417000 |
| C | -0.042265000 | 2.504184000  | -0.114996000 |
| C | -0.813283000 | 2.795876000  | 1.025838000  |
| C | 0.479818000  | 3.586171000  | -0.848955000 |
| C | -1.061959000 | 4.113157000  | 1.413743000  |
| H | -1.229672000 | 1.983337000  | 1.612183000  |
| C | 0.229595000  | 4.904265000  | -0.462691000 |
| H | 1.089001000  | 3.391120000  | -1.723499000 |
| C | -0.541354000 | 5.176978000  | 0.670971000  |
| H | -1.663581000 | 4.306569000  | 2.298407000  |
| H | 0.643595000  | 5.720156000  | -1.049938000 |
| H | -0.732748000 | 6.203755000  | 0.972430000  |
| N | 1.429459000  | 0.637980000  | -0.884955000 |
| N | 2.459437000  | 1.444835000  | -0.899882000 |
| S | 3.854079000  | 0.591779000  | -1.398484000 |
| O | 4.920139000  | 1.615927000  | -1.461793000 |
| O | 3.621476000  | -0.259863000 | -2.588509000 |
| C | 4.266856000  | -0.520867000 | -0.033952000 |
| C | 3.577176000  | -1.729781000 | 0.110121000  |
| C | 5.244640000  | -0.147408000 | 0.887587000  |
| C | 3.883467000  | -2.564258000 | 1.183819000  |
| H | 2.807590000  | -2.003320000 | -0.603353000 |
| C | 5.543695000  | -0.998447000 | 1.955144000  |
| H | 5.767329000  | 0.794807000  | 0.761875000  |
| C | 4.870336000  | -2.216086000 | 2.121761000  |
| H | 3.343882000  | -3.501984000 | 1.296945000  |
| H | 6.312461000  | -0.708218000 | 2.667553000  |
| C | 5.186107000  | -3.134082000 | 3.278865000  |
| H | 5.491354000  | -4.127576000 | 2.928343000  |

|   |              |              |              |
|---|--------------|--------------|--------------|
| H | 5.995105000  | -2.734215000 | 3.897927000  |
| H | 4.309922000  | -3.275310000 | 3.923683000  |
| C | -3.194844000 | -0.180601000 | -0.177434000 |
| N | -4.077603000 | 0.468925000  | 0.455452000  |
| C | -5.361022000 | 0.089436000  | 1.056206000  |
| C | -6.482733000 | 0.154714000  | -0.001505000 |
| C | -5.344544000 | -1.266647000 | 1.792830000  |
| C | -5.639696000 | 1.188904000  | 2.107618000  |
| H | -6.482881000 | 1.134680000  | -0.490190000 |
| H | -6.372506000 | -0.604301000 | -0.780318000 |
| H | -7.459559000 | 0.008875000  | 0.474197000  |
| H | -4.509916000 | -1.301668000 | 2.501823000  |
| H | -6.273202000 | -1.385970000 | 2.362888000  |
| H | -5.253393000 | -2.124832000 | 1.126372000  |
| H | -6.609466000 | 1.031668000  | 2.594315000  |
| H | -4.861339000 | 1.186384000  | 2.878064000  |
| H | -5.637628000 | 2.175639000  | 1.634153000  |

11.

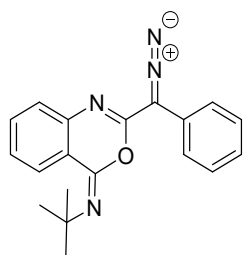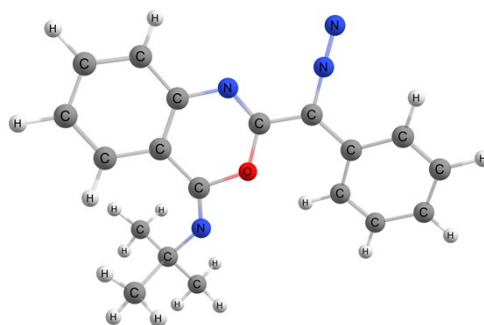

|                                              |                             |
|----------------------------------------------|-----------------------------|
| Zero-point correction=                       | 0.333833 (Hartree/Particle) |
| Thermal correction to Energy=                | 0.355203                    |
| Thermal correction to Enthalpy=              | 0.356147                    |
| Thermal correction to Gibbs Free Energy=     | 0.282356                    |
| Sum of electronic and zero-point Energies=   | -1028.763913                |
| Sum of electronic and thermal Energies=      | -1028.742543                |
| Sum of electronic and thermal Enthalpies=    | -1028.741599                |
| Sum of electronic and thermal Free Energies= | -1028.815390                |

|   |              |              |              |
|---|--------------|--------------|--------------|
| C | -4.160704000 | -1.956285000 | -0.555374000 |
| C | -3.407848000 | -0.787203000 | -0.609599000 |
| C | -2.052934000 | -0.782796000 | -0.239874000 |
| C | -1.441919000 | -2.008958000 | 0.139251000  |
| C | -2.223145000 | -3.175670000 | 0.226189000  |
| C | -3.569181000 | -3.149044000 | -0.115368000 |
| H | -5.204202000 | -1.939231000 | -0.854263000 |
| H | -3.873227000 | 0.122644000  | -0.962673000 |
| H | -1.737767000 | -4.093520000 | 0.542302000  |
| H | -4.159039000 | -4.059357000 | -0.057455000 |
| N | -0.082804000 | -2.108008000 | 0.406629000  |
| C | 0.649510000  | -1.095466000 | 0.069933000  |

|   |              |              |              |
|---|--------------|--------------|--------------|
| O | 0.182663000  | 0.078057000  | -0.404432000 |
| C | 2.104881000  | -1.158513000 | 0.135695000  |
| C | 3.103147000  | -0.073964000 | -0.014403000 |
| C | 2.783111000  | 1.265369000  | 0.277908000  |
| C | 4.415182000  | -0.378748000 | -0.425701000 |
| C | 3.751623000  | 2.262108000  | 0.154215000  |
| H | 1.780847000  | 1.531173000  | 0.588880000  |
| C | 5.378822000  | 0.623045000  | -0.536365000 |
| H | 4.687906000  | -1.401585000 | -0.670910000 |
| C | 5.052644000  | 1.950863000  | -0.249052000 |
| H | 3.482798000  | 3.289844000  | 0.381445000  |
| H | 6.383791000  | 0.362981000  | -0.856472000 |
| H | 5.801503000  | 2.732146000  | -0.339889000 |
| N | 2.564251000  | -2.371982000 | 0.366724000  |
| N | 2.978063000  | -3.412912000 | 0.563776000  |
| C | -1.201850000 | 0.423911000  | -0.219501000 |
| N | -1.340677000 | 1.666113000  | -0.090412000 |
| C | -2.488244000 | 2.545856000  | 0.173123000  |
| C | -3.224733000 | 2.850879000  | -1.146936000 |
| C | -3.443263000 | 2.010734000  | 1.258643000  |
| C | -1.866315000 | 3.861489000  | 0.690743000  |
| H | -2.523183000 | 3.240693000  | -1.891599000 |
| H | -3.708563000 | 1.968371000  | -1.573103000 |
| H | -3.997348000 | 3.608439000  | -0.976115000 |
| H | -2.884291000 | 1.761733000  | 2.167319000  |
| H | -4.172221000 | 2.786569000  | 1.516902000  |
| H | -3.999708000 | 1.124379000  | 0.951572000  |
| H | -2.642483000 | 4.609963000  | 0.884485000  |
| H | -1.316525000 | 3.685855000  | 1.621539000  |
| H | -1.164110000 | 4.266322000  | -0.044684000 |

12.

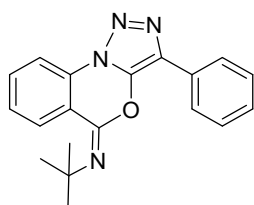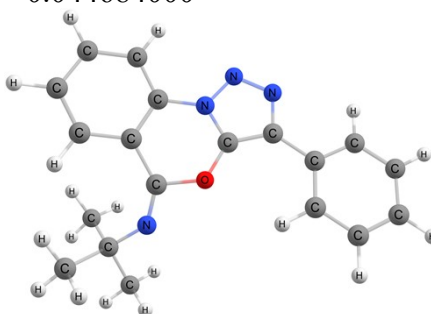

|                                              |                             |
|----------------------------------------------|-----------------------------|
| Zero-point correction=                       | 0.336900 (Hartree/Particle) |
| Thermal correction to Energy=                | 0.356967                    |
| Thermal correction to Enthalpy=              | 0.357911                    |
| Thermal correction to Gibbs Free Energy=     | 0.287859                    |
| Sum of electronic and zero-point Energies=   | -1028.774808                |
| Sum of electronic and thermal Energies=      | -1028.754741                |
| Sum of electronic and thermal Enthalpies=    | -1028.753797                |
| Sum of electronic and thermal Free Energies= | -1028.823849                |

|   |              |              |              |
|---|--------------|--------------|--------------|
| C | -3.893203000 | -2.172390000 | -0.673325000 |
| C | -3.284549000 | -0.919524000 | -0.692000000 |
| C | -1.944720000 | -0.761597000 | -0.306494000 |
| C | -1.226067000 | -1.928841000 | 0.034535000  |
| C | -1.826820000 | -3.187599000 | 0.076931000  |
| C | -3.171391000 | -3.300009000 | -0.266859000 |
| H | -4.929851000 | -2.269136000 | -0.979838000 |
| H | -3.848260000 | -0.060450000 | -1.027582000 |
| H | -1.236276000 | -4.052420000 | 0.355837000  |
| H | -3.649591000 | -4.274226000 | -0.241800000 |
| N | 0.143666000  | -1.761359000 | 0.272712000  |
| C | 0.808191000  | -0.628793000 | -0.066512000 |
| O | 0.159001000  | 0.441027000  | -0.546233000 |
| C | 2.150505000  | -0.892068000 | 0.173695000  |
| C | 3.344385000  | -0.058327000 | -0.001146000 |
| C | 3.250268000  | 1.260600000  | -0.481661000 |
| C | 4.614224000  | -0.576075000 | 0.314251000  |
| C | 4.398451000  | 2.038695000  | -0.639084000 |
| H | 2.281222000  | 1.679985000  | -0.730075000 |
| C | 5.756586000  | 0.206717000  | 0.153476000  |
| H | 4.695223000  | -1.592438000 | 0.684827000  |
| C | 5.656020000  | 1.517781000  | -0.323582000 |
| H | 4.306900000  | 3.055669000  | -1.010392000 |
| H | 6.729163000  | -0.209279000 | 0.401788000  |
| H | 6.547799000  | 2.125505000  | -0.447918000 |
| N | 2.204421000  | -2.179130000 | 0.650299000  |
| N | 1.020600000  | -2.714414000 | 0.713324000  |
| C | -1.256886000 | 0.558943000  | -0.263142000 |
| N | -1.588573000 | 1.749034000  | -0.070492000 |
| C | -2.828275000 | 2.442692000  | 0.309174000  |
| C | -3.635254000 | 2.770003000  | -0.963177000 |
| C | -3.675705000 | 1.688790000  | 1.352442000  |
| C | -2.355929000 | 3.770716000  | 0.940272000  |
| H | -3.012157000 | 3.312115000  | -1.681518000 |
| H | -4.019516000 | 1.874744000  | -1.459844000 |
| H | -4.489870000 | 3.404134000  | -0.704757000 |
| H | -3.061169000 | 1.409331000  | 2.215101000  |
| H | -4.473973000 | 2.346933000  | 1.711553000  |
| H | -4.145910000 | 0.785006000  | 0.963050000  |
| H | -3.213176000 | 4.391173000  | 1.222832000  |
| H | -1.757798000 | 3.578774000  | 1.837169000  |
| H | -1.734558000 | 4.329175000  | 0.233752000  |

13.

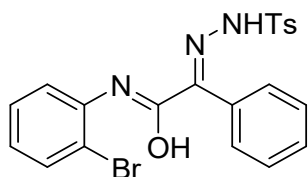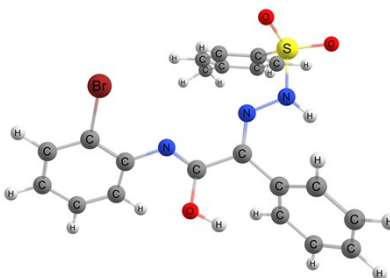

Zero-point correction= 0.352984 (Hartree/Particle)  
 Thermal correction to Energy= 0.379936  
 Thermal correction to Enthalpy= 0.380880  
 Thermal correction to Gibbs Free Energy= 0.289783  
 Sum of electronic and zero-point Energies= -1612.171363  
 Sum of electronic and thermal Energies= -1612.144412  
 Sum of electronic and thermal Enthalpies= -1612.143467  
 Sum of electronic and thermal Free Energies= -1612.234564

|    |              |              |              |
|----|--------------|--------------|--------------|
| C  | -5.585262000 | -0.547744000 | 1.550377000  |
| C  | -5.174376000 | -0.827396000 | 0.244956000  |
| C  | -3.870720000 | -0.528185000 | -0.144389000 |
| C  | -2.947868000 | 0.064951000  | 0.732039000  |
| C  | -3.387646000 | 0.339253000  | 2.042133000  |
| C  | -4.685280000 | 0.035406000  | 2.447333000  |
| H  | -6.598852000 | -0.786673000 | 1.858114000  |
| H  | -5.861159000 | -1.277097000 | -0.464141000 |
| H  | -2.685496000 | 0.785524000  | 2.739694000  |
| H  | -4.993461000 | 0.255971000  | 3.465468000  |
| Br | -3.327572000 | -0.925462000 | -1.977144000 |
| N  | -1.610917000 | 0.257157000  | 0.355308000  |
| C  | -1.076838000 | 1.410199000  | 0.289532000  |
| O  | -1.773849000 | 2.550805000  | 0.541155000  |
| C  | 0.364113000  | 1.590813000  | -0.082259000 |
| C  | 1.061038000  | 2.858764000  | 0.304624000  |
| C  | 1.224049000  | 3.196596000  | 1.661113000  |
| C  | 1.568171000  | 3.723514000  | -0.683217000 |
| C  | 1.884309000  | 4.373645000  | 2.020121000  |
| H  | 0.839657000  | 2.533751000  | 2.431987000  |
| C  | 2.222303000  | 4.902262000  | -0.318473000 |
| H  | 1.443713000  | 3.472806000  | -1.733048000 |
| C  | 2.382989000  | 5.227755000  | 1.031756000  |
| H  | 2.009206000  | 4.622074000  | 3.070074000  |
| H  | 2.605035000  | 5.564845000  | -1.089262000 |
| H  | 2.894468000  | 6.143914000  | 1.312662000  |
| N  | 0.908671000  | 0.622834000  | -0.737023000 |
| N  | 2.205933000  | 0.706966000  | -1.097568000 |
| H  | 2.842999000  | 1.327037000  | -0.590675000 |

|   |              |              |              |
|---|--------------|--------------|--------------|
| S | 2.948673000  | -0.755715000 | -1.617505000 |
| O | 4.358252000  | -0.360251000 | -1.739411000 |
| O | 2.178675000  | -1.235582000 | -2.762937000 |
| C | 2.765523000  | -1.914304000 | -0.268622000 |
| C | 1.562704000  | -2.613884000 | -0.126264000 |
| C | 3.822019000  | -2.090812000 | 0.628703000  |
| C | 1.426562000  | -3.500758000 | 0.939922000  |
| H | 0.749942000  | -2.462719000 | -0.827548000 |
| C | 3.664884000  | -2.989012000 | 1.684637000  |
| H | 4.750902000  | -1.546484000 | 0.495886000  |
| C | 2.470624000  | -3.706661000 | 1.857244000  |
| H | 0.491738000  | -4.041954000 | 1.059386000  |
| H | 4.485850000  | -3.136885000 | 2.381330000  |
| C | 2.317888000  | -4.697257000 | 2.984371000  |
| H | 2.524975000  | -5.717036000 | 2.634856000  |
| H | 3.010513000  | -4.483571000 | 3.803935000  |
| H | 1.299015000  | -4.692560000 | 3.384854000  |
| H | -1.208340000 | 3.330341000  | 0.417280000  |

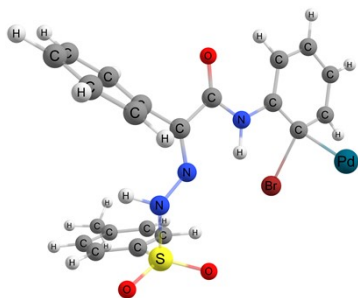

TS<sub>3-4</sub>

|                                              |                             |
|----------------------------------------------|-----------------------------|
| Zero-point correction=                       | 0.353802 (Hartree/Particle) |
| Thermal correction to Energy=                | 0.382112                    |
| Thermal correction to Enthalpy=              | 0.383056                    |
| Thermal correction to Gibbs Free Energy=     | 0.288377                    |
| Sum of electronic and zero-point Energies=   | -1740.118715                |
| Sum of electronic and thermal Energies=      | -1740.090406                |
| Sum of electronic and thermal Enthalpies=    | -1740.089461                |
| Sum of electronic and thermal Free Energies= | -1740.184141                |

|    |              |              |             |
|----|--------------|--------------|-------------|
| C  | -5.134635000 | 0.804045000  | 1.773065000 |
| C  | -4.572577000 | -0.210041000 | 0.984194000 |
| C  | -3.240491000 | -0.081813000 | 0.521527000 |
| C  | -2.420966000 | 1.022307000  | 0.931361000 |
| C  | -3.016594000 | 2.005174000  | 1.734578000 |
| C  | -4.352598000 | 1.894700000  | 2.144037000 |
| H  | -6.161425000 | 0.711211000  | 2.114429000 |
| H  | -5.117575000 | -1.128470000 | 0.796277000 |
| H  | -2.421638000 | 2.857070000  | 2.032356000 |
| H  | -4.770056000 | 2.674863000  | 2.773704000 |
| Br | -2.217881000 | -1.984025000 | 0.231486000 |

|    |              |              |              |
|----|--------------|--------------|--------------|
| N  | -1.083950000 | 1.065961000  | 0.510159000  |
| H  | -0.763746000 | 0.293071000  | -0.065843000 |
| C  | -0.161492000 | 2.057350000  | 0.711092000  |
| O  | -0.353129000 | 3.075050000  | 1.376566000  |
| C  | 1.166612000  | 1.838527000  | 0.016661000  |
| C  | 2.218369000  | 2.883155000  | 0.168740000  |
| C  | 2.718884000  | 3.212066000  | 1.439422000  |
| C  | 2.724401000  | 3.548492000  | -0.961360000 |
| C  | 3.716021000  | 4.179115000  | 1.573582000  |
| H  | 2.324273000  | 2.714368000  | 2.319345000  |
| C  | 3.714746000  | 4.523806000  | -0.821257000 |
| H  | 2.331770000  | 3.315227000  | -1.947305000 |
| C  | 4.214709000  | 4.838009000  | 0.445221000  |
| H  | 4.097375000  | 4.424170000  | 2.560766000  |
| H  | 4.091125000  | 5.037691000  | -1.701132000 |
| H  | 4.985836000  | 5.595605000  | 0.553540000  |
| N  | 1.278949000  | 0.762288000  | -0.688303000 |
| N  | 2.416982000  | 0.519352000  | -1.379680000 |
| H  | 3.275781000  | 1.011099000  | -1.116191000 |
| S  | 2.688217000  | -1.090880000 | -1.912630000 |
| O  | 3.958056000  | -0.968461000 | -2.637660000 |
| O  | 1.455941000  | -1.526676000 | -2.566528000 |
| C  | 2.949541000  | -2.075239000 | -0.442407000 |
| C  | 1.852262000  | -2.665993000 | 0.191836000  |
| C  | 4.244884000  | -2.222418000 | 0.060280000  |
| C  | 2.065967000  | -3.412052000 | 1.348988000  |
| H  | 0.855082000  | -2.550599000 | -0.217741000 |
| C  | 4.436005000  | -2.975579000 | 1.219245000  |
| H  | 5.087865000  | -1.770558000 | -0.451737000 |
| C  | 3.355925000  | -3.580393000 | 1.880817000  |
| H  | 1.216380000  | -3.874818000 | 1.844523000  |
| H  | 5.442278000  | -3.099518000 | 1.610312000  |
| C  | 3.568520000  | -4.410375000 | 3.122036000  |
| H  | 2.870928000  | -4.122680000 | 3.916345000  |
| H  | 3.399037000  | -5.474088000 | 2.913250000  |
| H  | 4.586640000  | -4.304073000 | 3.506901000  |
| Pd | -3.690681000 | -0.076612000 | -1.427520000 |

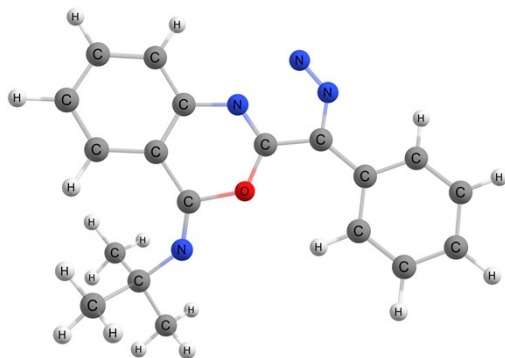

TS<sub>11-12</sub>

|                                              |                             |
|----------------------------------------------|-----------------------------|
| Zero-point correction=                       | 0.333616 (Hartree/Particle) |
| Thermal correction to Energy=                | 0.354024                    |
| Thermal correction to Enthalpy=              | 0.354969                    |
| Thermal correction to Gibbs Free Energy=     | 0.282885                    |
| Sum of electronic and zero-point Energies=   | -1028.745273                |
| Sum of electronic and thermal Energies=      | -1028.724864                |
| Sum of electronic and thermal Enthalpies=    | -1028.723920                |
| Sum of electronic and thermal Free Energies= | -1028.796004                |

|   |              |              |              |
|---|--------------|--------------|--------------|
| C | -4.061123000 | -2.007797000 | -0.631036000 |
| C | -3.363172000 | -0.804004000 | -0.616396000 |
| C | -2.007476000 | -0.756018000 | -0.252246000 |
| C | -1.347187000 | -1.978319000 | 0.043504000  |
| C | -2.063210000 | -3.186185000 | 0.056530000  |
| C | -3.412731000 | -3.197751000 | -0.272614000 |
| H | -5.106702000 | -2.019743000 | -0.922182000 |
| H | -3.872923000 | 0.102481000  | -0.910063000 |
| H | -1.532513000 | -4.099295000 | 0.305523000  |
| H | -3.959696000 | -4.136013000 | -0.270178000 |
| N | 0.015181000  | -1.995421000 | 0.286695000  |
| C | 0.723567000  | -0.924004000 | 0.043841000  |
| O | 0.196240000  | 0.252765000  | -0.325539000 |
| C | 2.156773000  | -1.042732000 | 0.160913000  |
| C | 3.246383000  | -0.081258000 | -0.019542000 |
| C | 3.016346000  | 1.282327000  | -0.287111000 |
| C | 4.581776000  | -0.525986000 | 0.081166000  |
| C | 4.089439000  | 2.161827000  | -0.446263000 |
| H | 2.004236000  | 1.656791000  | -0.367978000 |
| C | 5.644681000  | 0.359141000  | -0.078552000 |
| H | 4.784257000  | -1.573567000 | 0.285877000  |
| C | 5.407104000  | 1.711935000  | -0.344397000 |
| H | 3.886056000  | 3.209416000  | -0.650721000 |
| H | 6.662931000  | -0.010867000 | 0.004205000  |
| H | 6.236424000  | 2.401932000  | -0.469417000 |
| N | 2.393432000  | -2.322263000 | 0.501167000  |
| N | 1.668314000  | -3.228982000 | 0.685259000  |
| C | -1.224664000 | 0.495922000  | -0.165972000 |
| N | -1.441198000 | 1.719697000  | -0.006492000 |
| C | -2.624167000 | 2.547193000  | 0.265140000  |
| C | -3.352875000 | 2.863036000  | -1.056656000 |
| C | -3.570937000 | 1.941650000  | 1.320228000  |
| C | -2.059964000 | 3.869130000  | 0.830735000  |
| H | -2.656179000 | 3.299909000  | -1.779306000 |
| H | -3.800110000 | 1.977806000  | -1.516368000 |
| H | -4.153919000 | 3.587442000  | -0.874164000 |
| H | -3.014046000 | 1.684744000  | 2.227839000  |
| H | -4.331339000 | 2.681362000  | 1.593002000  |
| H | -4.090723000 | 1.046027000  | 0.977734000  |



|   |              |             |             |
|---|--------------|-------------|-------------|
| H | -2.867478000 | 4.579662000 | 1.038368000 |
| H | -1.512951000 | 3.685677000 | 1.761420000 |
| H | -1.366715000 | 4.324253000 | 0.116669000 |

### X-ray crystal data of compound 3b:

X-ray data for compound 3b was collected at 150 K using Rigaku Oxford Diffraction, 2017 system. Mo-K $\alpha$  radiation ( $\lambda = 0.71073 \text{ \AA}$ ) was used for the experiments. The structures were solved by direct methods using SHELXT and refined using SHELXL.<sup>1</sup> **CCDC 1985462** contains supplementary Crystallographic data for the structure. These data can be obtained free of charge at [www.ccdc.cam.ac.uk](http://www.ccdc.cam.ac.uk) or from the Cambridge Crystallographic Data Centre (CCDC), 12 Union Road, Cambridge CB2 1EZ, UK; fax: +44(0) 1223 336 033; email: [deposit@ccdc.cam.ac.uk](mailto:deposit@ccdc.cam.ac.uk).

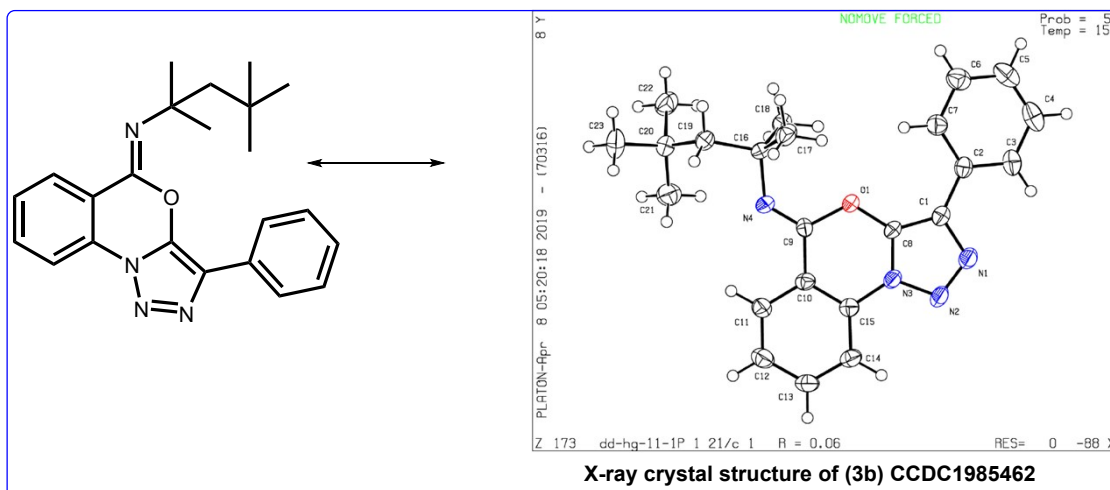

### References:

- (a) Sheldrick, G. M. *Acta Cryst.* **2015**, *A71*, 3-8; <https://doi.org/10.1107/S2053273314026370>.  
 (b) Sheldrick, G. M. *Acta Cryst.* **2015**, *C71*, 3-8; [doi:10.1107/S2053229614024218](https://doi.org/10.1107/S2053229614024218).

**Crystal Data and Structure Refinement:**

|                                                            |                                                                            |
|------------------------------------------------------------|----------------------------------------------------------------------------|
| Identification code                                        | 3b (dd-hg-11)                                                              |
| Empirical formula                                          | C <sub>23</sub> H <sub>26</sub> N <sub>4</sub> O                           |
| Formula weight                                             | 374.48                                                                     |
| Temperature/K                                              | 150°                                                                       |
| Crystal system                                             | monoclinic                                                                 |
| Space group                                                | P 1                                                                        |
| <i>a</i> /Å                                                | 15.2432(13)                                                                |
| <i>b</i> /Å                                                | 6.8557(4)                                                                  |
| <i>c</i> /Å                                                | 19.6543(15)                                                                |
| $\alpha$ /°                                                | 90                                                                         |
| $\beta$ /°                                                 | 99.415(7)                                                                  |
| $\gamma$ /°                                                | 90                                                                         |
| Volume/Å <sup>3</sup>                                      | 2026.3(3)                                                                  |
| <i>Z</i>                                                   | 4                                                                          |
| $\rho_{\text{calc}}$ /cm <sup>3</sup>                      | 1.228                                                                      |
| $\mu$ /mm <sup>-1</sup>                                    | 0.077                                                                      |
| F(000)                                                     | 800                                                                        |
| Crystal size/mm <sup>3</sup>                               | 0.15 x 0.28 x 0.4                                                          |
| Radiation MoK $\alpha$                                     | 0.71073                                                                    |
| 2 $\theta$ range for data collection/°                     | 2.679- 25.999                                                              |
| Index ranges                                               | -18 $\leq$ h $\leq$ 14,<br>-6 $\leq$ k $\leq$ 8,<br>-24 $\leq$ l $\leq$ 20 |
| Reflections collected                                      | 3991                                                                       |
| Independent reflections                                    | 2822                                                                       |
| parameters                                                 | 258                                                                        |
| Goodness-of-fit on F <sup>2</sup>                          | 1.080                                                                      |
| Final R indexes [ <i>I</i> $\geq$ 2 $\sigma$ ( <i>I</i> )] | 0.0559                                                                     |
| Final R indexes [all data]                                 | 0.0831                                                                     |
| Largest diff. peak/hole / e<br>Å <sup>-3</sup>             | 0.299/ -0.311                                                              |

|                    |                |
|--------------------|----------------|
| <b>CCDC Number</b> | <b>1985462</b> |
|--------------------|----------------|
